# Supplementary material
Source: PubMed Central journal article supplement (PMC4230374)
Supplement: ct500572t_si_001.pdf [file ct500572t_si_001.pdf]

## Supporting information for

### Alternative pathway for the reaction catalyzed by DNA dealkylase AlkB from *ab initio* QM/MM calculations

Dong Fang and G. Andrés Cisneros\*

Department of Chemistry, Wayne State University, Detroit, MI 48202

**Scheme S1.** Proposed Mechanism for Direct Dealkylation of 1-meA Catalyzed by AlkB.

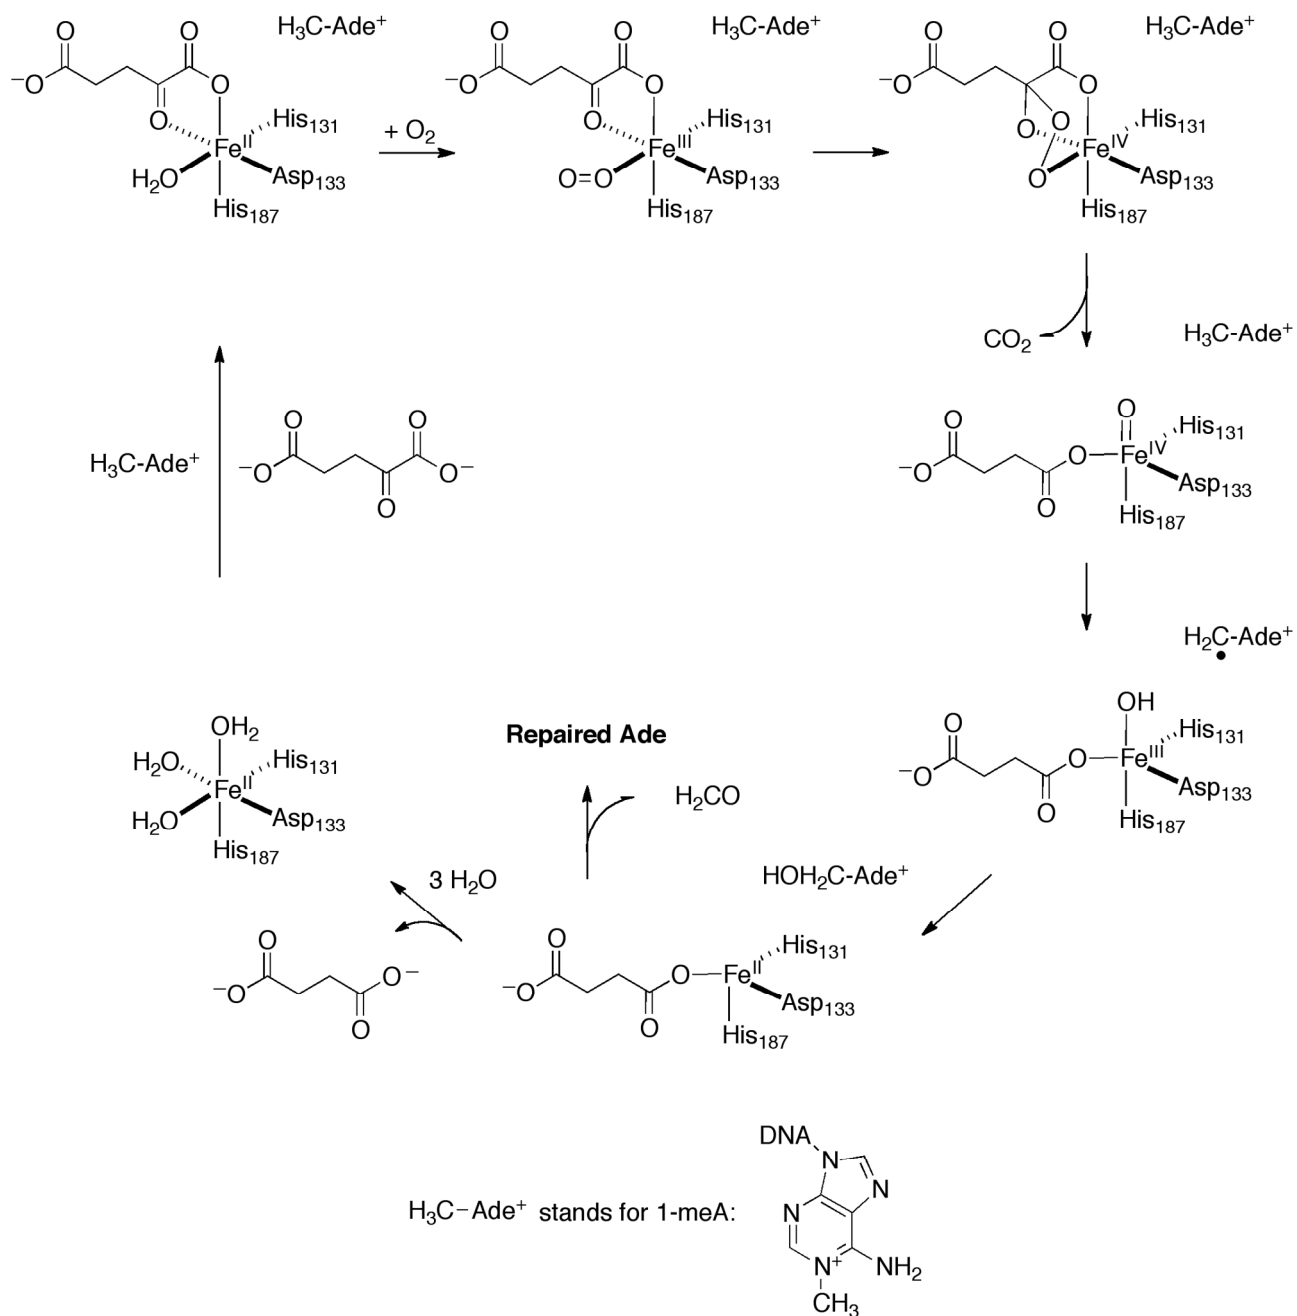

**Figure S1.** The active sites of crystal structures of AlkB with different substrates.

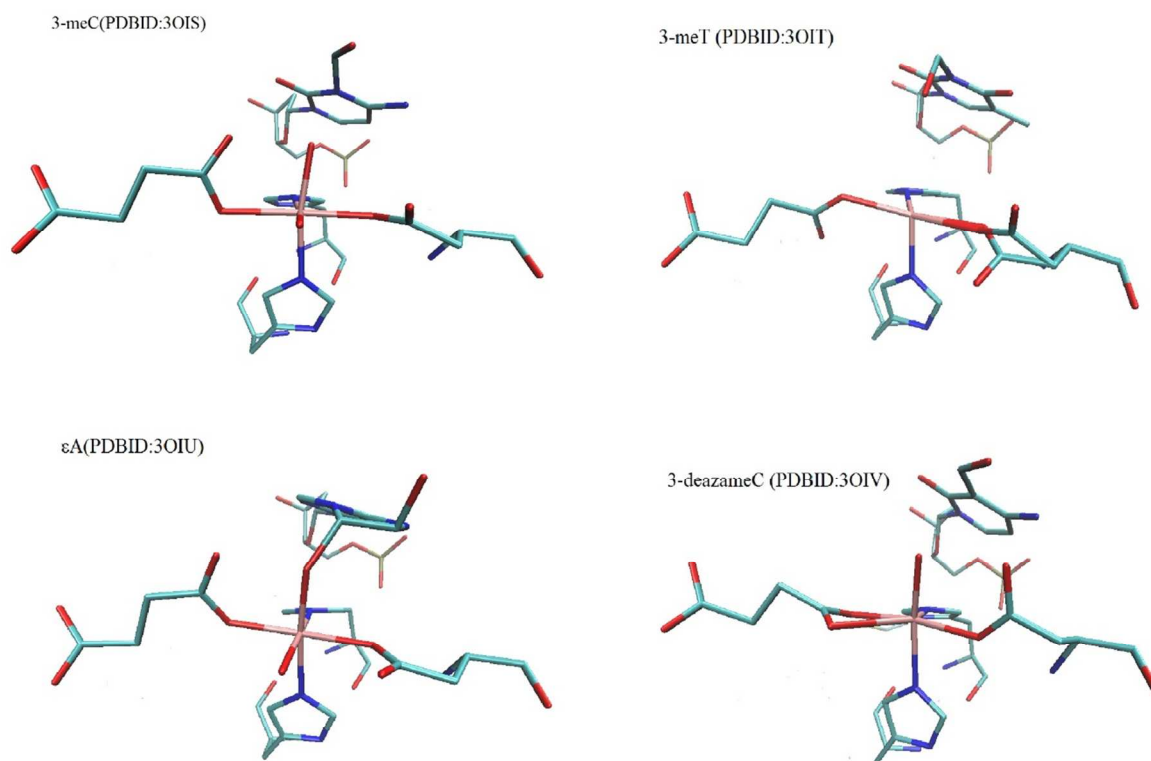

**Figure S2.** Electron configuration diagram of the iron(IV)-oxo moiety in the quintet and triplet states in an ideal octahedral ligand field. (HS, IS and LS represent high-spin, intermediate-spin and low-spin on Fe, respectively; AF and F stand for antiferromagnetic and ferromagnetic.)

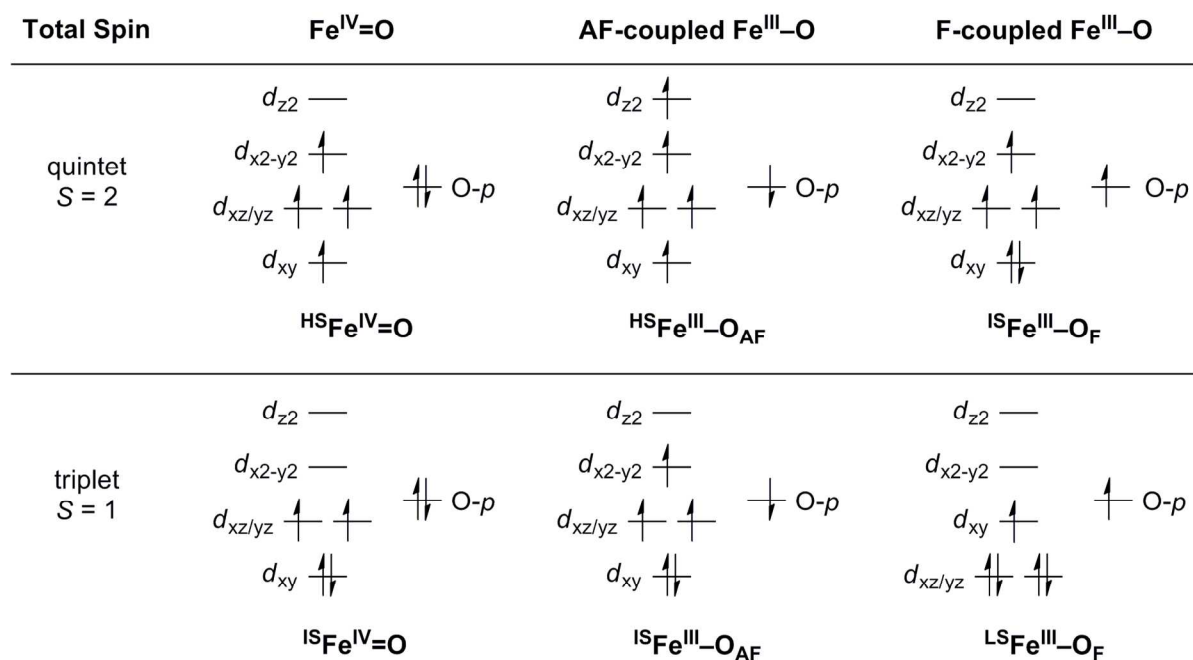

**Figure S3.** Relative energies (kcal/mol, the lowest state <sup>1</sup>Fe<sup>III</sup>-O<sub>F</sub> is taken as zero) of reactant, TS and II and Mulliken spin populations of key atoms (Fe, the first O is oxo, and the second O is the O of OH<sup>-</sup> bound to the iron, and the carbon of methyl group of 1-meA) for the hydrogen abstraction step for H<sub>2</sub>O pathway in quintet (<sup>1</sup>Fe<sup>III</sup>-O<sub>F</sub> and <sup>5</sup>Fe<sup>III</sup>-O<sub>AF</sub>) and triplet states (<sup>3</sup>Fe<sup>III</sup>-O<sub>F</sub> and <sup>3</sup>Fe<sup>III</sup>-O<sub>AF</sub>).

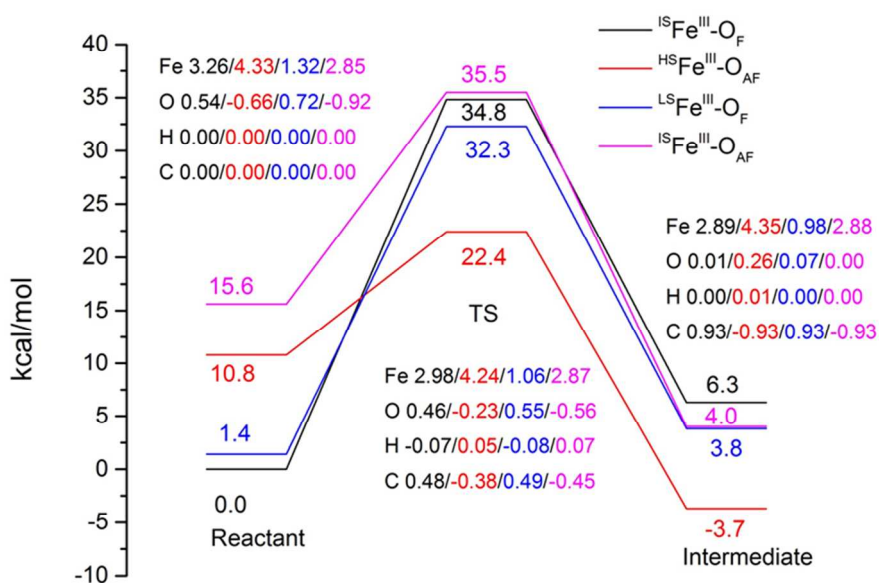

**Table S1.** Spin population for Fe and O (oxo) in  $^{\text{HS}}\text{Fe}^{\text{III}}\text{-O}_{\text{AF}}$  and  $^{\text{IS}}\text{Fe}^{\text{III}}\text{-O}_{\text{F}}$  states with different distances between Fe and O ( $d(\text{Fe-O}_{\text{oxo}})$ ) for the  $\text{H}_2\text{O}$  pathway. The numbers in italics correspond to the optimized MECP. Except MECP, all other structures are obtained by only moving O with all other atoms fixed starting from the optimized  $^{\text{HS}}\text{Fe}^{\text{III}}\text{-O}_{\text{AF}}$  reactant.

| $d(\text{Fe-O}_{\text{oxo}})$ | Spin population (Fe, $^{\text{HS}}\text{Fe}^{\text{III}}\text{-O}_{\text{AF}}$ ) | Spin population ( $\text{O}_{\text{oxo}}$ , $^{\text{HS}}\text{Fe}^{\text{III}}\text{-O}_{\text{AF}}$ ) | Spin population (Fe, $^{\text{IS}}\text{Fe}^{\text{III}}\text{-O}_{\text{F}}$ ) | Spin population ( $\text{O}_{\text{oxo}}$ , $^{\text{IS}}\text{Fe}^{\text{III}}\text{-O}_{\text{F}}$ ) |
|-------------------------------|----------------------------------------------------------------------------------|---------------------------------------------------------------------------------------------------------|---------------------------------------------------------------------------------|--------------------------------------------------------------------------------------------------------|
| 1.800                         | 4.33                                                                             | -0.66                                                                                                   | 3.02                                                                            | 0.85                                                                                                   |
| <i>1.781</i>                  | <i>4.32</i>                                                                      | <i>-0.65</i>                                                                                            | <i>3.03</i>                                                                     | <i>0.83</i>                                                                                            |
| 1.780                         | 4.32                                                                             | -0.64                                                                                                   | 3.04                                                                            | 0.82                                                                                                   |
| 1.770                         | 4.31                                                                             | -0.64                                                                                                   | 3.06                                                                            | 0.80                                                                                                   |
| 1.765                         | 4.31                                                                             | -0.63                                                                                                   | 3.07                                                                            | 0.79                                                                                                   |
| 1.760                         | 4.31                                                                             | -0.63                                                                                                   | 3.08                                                                            | 0.78                                                                                                   |
| 1.740                         | 4.29                                                                             | -0.61                                                                                                   | 3.14                                                                            | 0.71                                                                                                   |
| 1.720                         | 4.25                                                                             | -0.56                                                                                                   | 3.22                                                                            | 0.62                                                                                                   |
| 1.700                         | 4.23                                                                             | -0.54                                                                                                   | 3.27                                                                            | 0.57                                                                                                   |
| 1.680                         | 4.24                                                                             | -0.54                                                                                                   | 3.27                                                                            | 0.56                                                                                                   |
| 1.660                         | 4.23                                                                             | -0.53                                                                                                   | 3.27                                                                            | 0.56                                                                                                   |
| 1.640                         | 4.21                                                                             | -0.51                                                                                                   | 3.26                                                                            | 0.56                                                                                                   |
| 1.620                         | 4.19                                                                             | -0.48                                                                                                   | 3.25                                                                            | 0.57                                                                                                   |
| 1.600                         | 4.16                                                                             | -0.45                                                                                                   | 3.24                                                                            | 0.57                                                                                                   |

**Table S2.** Atomic contributions of key atoms (O is the oxo; C is the carbon of the methyl group of 1-meA; when the contribution of the key atom is less than 1%, the atom is not shown) to the  $\alpha$ -LUMO and  $\beta$ -LUMO for selected structures for the  $\text{H}_2\text{O}$  pathway.

| Structure                                                          | Atomic Contribution ( $\alpha$ -LUMO) | Atomic Contribution( $\beta$ -LUMO) |
|--------------------------------------------------------------------|---------------------------------------|-------------------------------------|
| $^{\text{IS}}\text{Fe}^{\text{III}}\text{-O}_{\text{F}}$ reactant  | Fe-45%,O-29%                          | Fe-88%, O-4%                        |
| $^{\text{HS}}\text{Fe}^{\text{III}}\text{-O}_{\text{AF}}$ reactant | Fe-5%,O-86%                           | Fe-92%                              |
| $^{\text{IS}}\text{Fe}^{\text{III}}\text{-O}_{\text{F}}$ MECP      | Fe-85%, O-85%                         | Fe-92%                              |
| $^{\text{HS}}\text{Fe}^{\text{III}}\text{-O}_{\text{AF}}$ MECP     | Fe-54%,O-22%                          | Fe-21%,O-69%                        |
| $^{\text{IS}}\text{Fe}^{\text{III}}\text{-O}_{\text{F}}$ TS        | Fe-55%,O-15%                          | Fe-12%,O-31%,C-32%                  |
| $^{\text{HS}}\text{Fe}^{\text{III}}\text{-O}_{\text{AF}}$ TS       | Fe-5%,O-43%,C-28%                     | Fe-91%                              |

**Table S3.** Atomic contributions of some key atoms (O is the oxo; C is the carbon of the methyl group of 1-meA; when the contribution of the key atom is less than 1%, the atom is not shown) to the  $\alpha$ -LUMO and  $\beta$ -LUMO for selected structures for the  $\text{OH}^-$  pathway.

| structure                                                                        | Atomic Contribution ( $\alpha$ -LUMO) | Atomic Contribution( $\beta$ -LUMO) |
|----------------------------------------------------------------------------------|---------------------------------------|-------------------------------------|
| $^{\text{IS}}\text{Fe}^{\text{III}}\text{-O}_{\text{F}}$ reactant                | Fe-22%,O-12%                          | Fe-2%                               |
| $^{\text{HS}}\text{Fe}^{\text{III}}\text{-O}_{\text{AF}}$ reactant               | Fe-5%,O-84%                           | ----                                |
| $^{\text{IS}}\text{Fe}^{\text{III}}\text{-O}_{\text{F}}$ $\text{T}_{\text{OH}}$  | Fe-16%, O-57%                         | Fe-81%                              |
| $^{\text{HS}}\text{Fe}^{\text{III}}\text{-O}_{\text{AF}}$ $\text{T}_{\text{OH}}$ | Fe-5%,O-79%                           | ----                                |
| $^{\text{IS}}\text{Fe}^{\text{III}}\text{-O}_{\text{F}}$ TS                      | Fe-11%,O-2%                           | Fe-19%,O-23%,C-29%                  |
| $^{\text{HS}}\text{Fe}^{\text{III}}\text{-O}_{\text{AF}}$ TS                     | Fe-2%,O-43%,C-43%                     | Fe-1%                               |

**Figure S4.** Relative energies (kcal/mol) of the structures along the minimum energy path (MEP) shown in Scheme1b for the H<sub>2</sub>O pathway in the quintet state. The energy of the <sup>15</sup>Fe<sup>III</sup>-O<sub>F</sub> reactant is taken as zero. For the TS structures, the values in parentheses are the energy differences between the TS and the immediate previous intermediate. The panel at the top right is the energy profile for the proton transfer to Glu136 starting from I2 with a different QM subsystem (Arg210, Glu136 and a bridging water are added to the QM system).

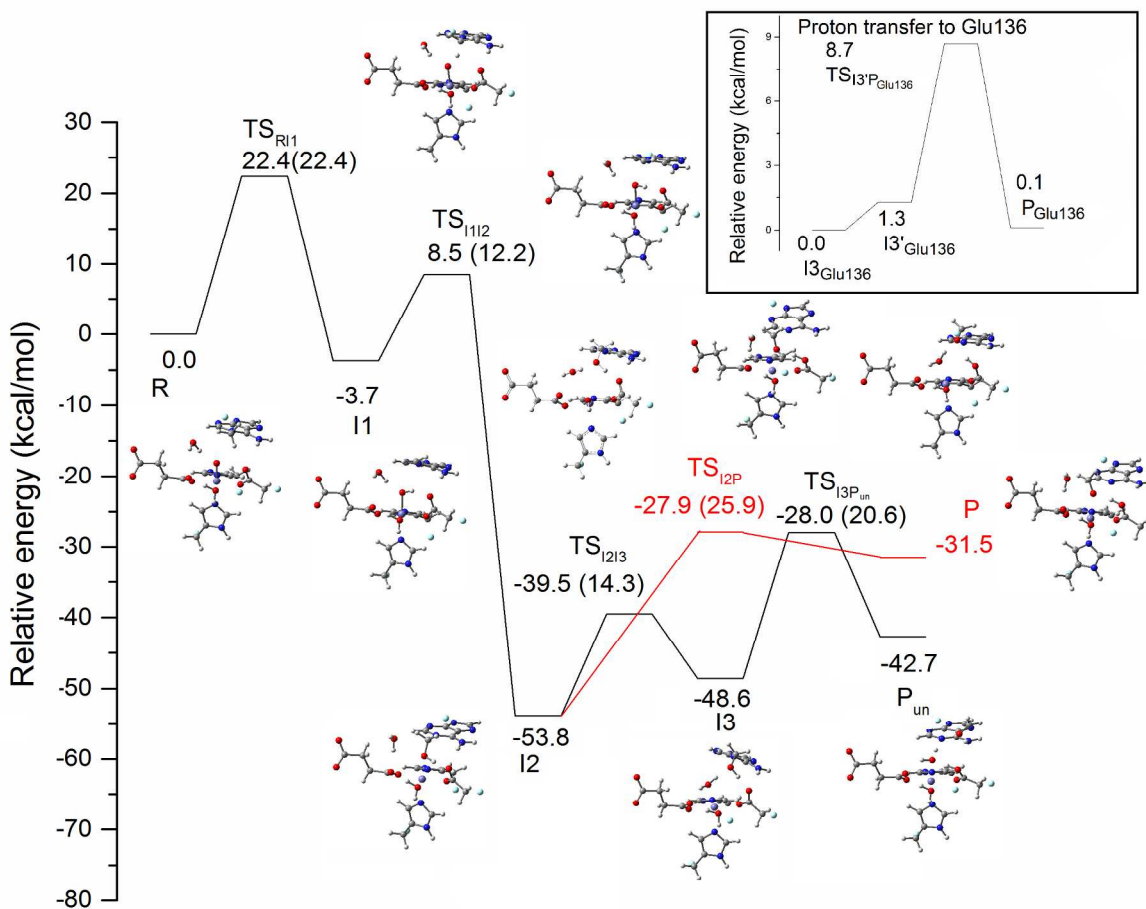

**Figure S5.** Relative energies (kcal/mol) of the structures shown in Scheme 1c for OH<sup>-</sup> pathway in the quintet state. The energy of the <sup>15</sup>Fe<sup>III</sup>-O<sub>F</sub> reactant is taken as zero. For the TS structures, the values in parentheses are the energy differences between the TS and the immediate previous intermediate.

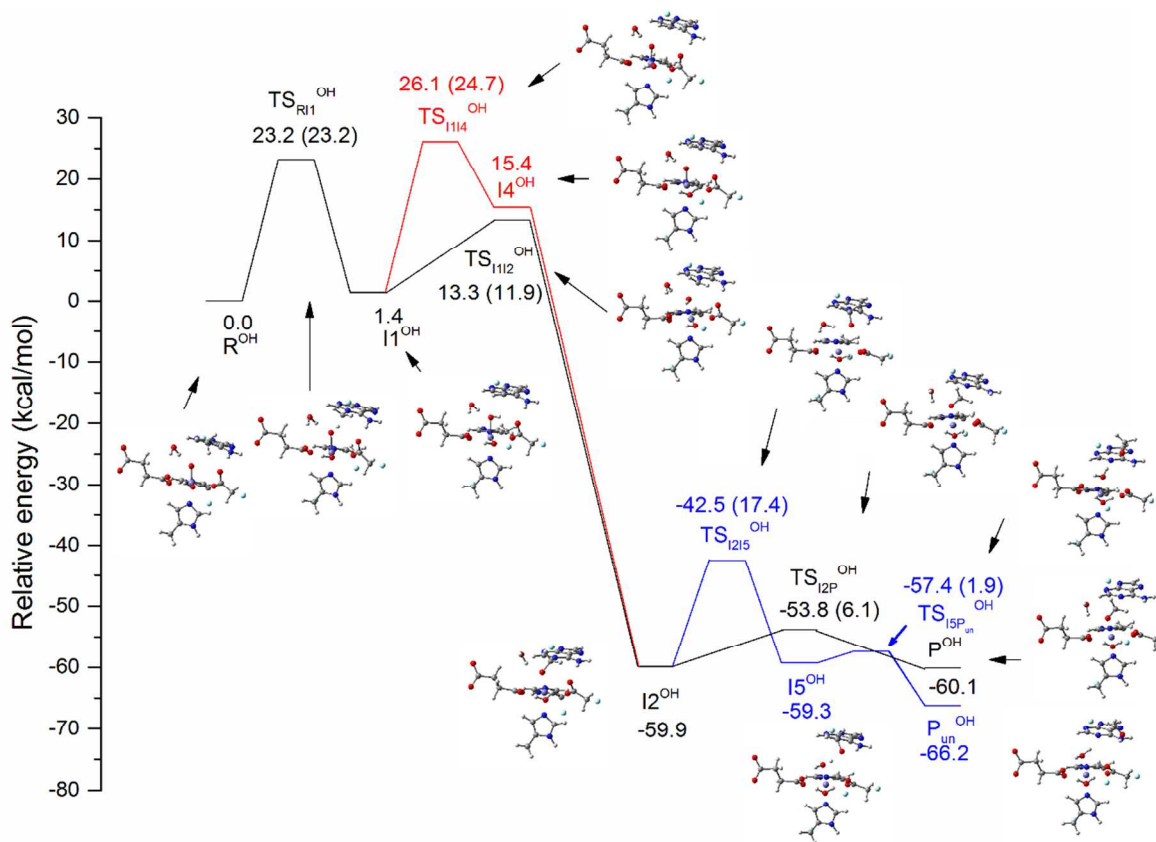

**Cartesian coordinates of QM part**

The H<sub>2</sub>O pathway

Refer to the supporting information of ref. 9 for R and TS<sub>R11</sub> and I1 coordinates for the H<sub>2</sub>O pathway. Cps represents the boundary carbon atoms.

I2<sup>OH</sup>

|    |         |         |         |
|----|---------|---------|---------|
| H  | -0.9631 | 3.6184  | -4.4801 |
| H  | -0.1039 | 2.7171  | -5.6961 |
| C  | 0.0188  | 1.9446  | -3.7634 |
| N  | 0.7050  | 0.7789  | -4.0326 |
| H  | 1.2051  | 0.5777  | -4.8996 |
| C  | 0.6341  | -0.0082 | -2.9398 |
| H  | 1.1071  | -0.9742 | -2.8475 |
| N  | -0.0677 | 0.5767  | -1.9833 |
| C  | -0.4606 | 1.7905  | -2.4939 |
| H  | -1.0292 | 2.4887  | -1.8974 |
| H  | -0.6258 | 3.4011  | 2.8492  |
| H  | -2.3327 | 3.2414  | 3.2320  |
| C  | -1.6688 | 2.0545  | 1.6409  |
| O  | -0.9370 | 1.9163  | 0.6275  |
| O  | -2.4681 | 1.1600  | 2.0560  |
| H  | 5.9720  | 0.7720  | -0.6571 |
| H  | 6.1576  | 2.4316  | -0.1657 |
| C  | 4.1749  | 1.7430  | -0.2354 |
| N  | 3.5752  | 2.8188  | 0.3855  |
| H  | 4.0358  | 3.6954  | 0.6408  |
| C  | 2.2963  | 2.4931  | 0.6541  |
| H  | 1.6044  | 3.1518  | 1.1548  |
| N  | 2.0263  | 1.2673  | 0.2310  |
| C  | 3.1948  | 0.7940  | -0.3203 |
| H  | 3.2529  | -0.1963 | -0.7471 |
| C  | -4.4424 | 1.9545  | -4.5416 |
| H  | -4.7551 | 2.6377  | -5.3190 |
| N  | -4.6098 | 2.1312  | -3.2501 |
| C  | -4.0633 | 1.0099  | -2.6735 |
| C  | -3.8985 | 0.6172  | -1.3195 |
| N  | -4.2535 | 1.3383  | -0.2805 |
| H  | -4.7575 | 2.2255  | -0.3821 |
| H  | -3.9275 | 1.1340  | 0.6602  |
| N  | -3.3151 | -0.6261 | -1.1743 |
| C  | -3.0856 | -1.2563 | 0.1553  |
| H  | -3.0767 | -2.3394 | 0.0215  |
| H  | -3.9406 | -0.9997 | 0.7892  |
| H  | -2.0695 | -0.0630 | 1.2806  |
| C  | -2.8270 | -1.3384 | -2.2435 |
| H  | -2.3369 | -2.2675 | -1.9736 |
| N  | -2.9117 | -0.9963 | -3.4860 |
| C  | -3.5531 | 0.1763  | -3.6476 |
| Fe | 0.1630  | 0.2070  | 0.1381  |
| O  | 1.0077  | -7.4303 | -0.0755 |
| C  | 1.6989  | -6.4349 | 0.2738  |
| O  | 2.8788  | -6.4925 | 0.6944  |
| C  | 0.9710  | -5.0922 | 0.2154  |
| H  | 0.2481  | -5.1313 | -0.6043 |
| H  | 0.3893  | -5.0421 | 1.1414  |
| C  | 1.8360  | -3.8419 | 0.0955  |
| H  | 2.6918  | -3.9528 | 0.7695  |
| H  | 2.2289  | -3.7096 | -0.9148 |
| C  | 1.0658  | -2.6081 | 0.5163  |
| O  | 1.0236  | -1.6065 | -0.2649 |
| O  | 0.4973  | -2.6354 | 1.6469  |
| O  | -1.8806 | -0.8580 | 0.6961  |
| O  | 0.2288  | -0.1719 | 2.2838  |
| H  | 0.2609  | -1.1695 | 2.2013  |
| H  | 1.0542  | 0.0862  | 2.7055  |
| O  | -2.0604 | -3.9349 | 1.2725  |

|     |         |         |         |
|-----|---------|---------|---------|
| H   | -1.2276 | -3.4975 | 1.5087  |
| H   | -2.3275 | -4.4381 | 2.0571  |
| C   | -0.0133 | 3.1128  | -4.6820 |
| C   | -1.6296 | 3.3564  | 2.4038  |
| C   | 5.5569  | 1.7696  | -0.8009 |
| N   | -3.8011 | 0.7873  | -4.8252 |
| Cps | 1.1654  | 4.0973  | -4.5877 |
| Cps | -1.9345 | 4.5740  | 1.5419  |
| Cps | 5.6516  | 2.1704  | -2.2832 |
| Cps | -3.3610 | 0.2605  | -6.0735 |

TS<sub>I213</sub>

|    |         |         |         |
|----|---------|---------|---------|
| H  | -0.9277 | 3.5541  | -4.4202 |
| H  | -0.0732 | 2.6504  | -5.6401 |
| C  | 0.1161  | 1.9203  | -3.6921 |
| N  | 0.7787  | 0.7413  | -3.9737 |
| H  | 1.2450  | 0.5270  | -4.8554 |
| C  | 0.7617  | -0.0242 | -2.8626 |
| H  | 1.2290  | -0.9934 | -2.7728 |
| N  | 0.1218  | 0.5907  | -1.8826 |
| C  | -0.2868 | 1.7983  | -2.3932 |
| H  | -0.8212 | 2.5051  | -1.7768 |
| H  | -0.6299 | 3.3070  | 2.7602  |
| H  | -2.3304 | 3.1936  | 3.1903  |
| C  | -1.7704 | 2.0031  | 1.5570  |
| O  | -0.9540 | 1.7587  | 0.6329  |
| O  | -2.7276 | 1.2419  | 1.8888  |
| H  | 6.0567  | 0.7943  | -0.6423 |
| H  | 6.2395  | 2.4601  | -0.1763 |
| C  | 4.2697  | 1.7411  | -0.1544 |
| N  | 3.6613  | 2.8147  | 0.4618  |
| H  | 4.1022  | 3.7119  | 0.6775  |
| C  | 2.4094  | 2.4565  | 0.7973  |
| H  | 1.7171  | 3.1081  | 1.3054  |
| N  | 2.1670  | 1.2074  | 0.4284  |
| C  | 3.3277  | 0.7550  | -0.1607 |
| H  | 3.4022  | -0.2457 | -0.5567 |
| C  | -4.3106 | 2.1111  | -4.6807 |
| H  | -4.4527 | 2.7972  | -5.5035 |
| N  | -4.5781 | 2.3623  | -3.4213 |
| C  | -4.2626 | 1.2004  | -2.7649 |
| C  | -4.2931 | 0.8560  | -1.3916 |
| N  | -4.5496 | 1.6764  | -0.3959 |
| H  | -4.8942 | 2.6293  | -0.5305 |
| H  | -4.2921 | 1.4571  | 0.5622  |
| N  | -4.0119 | -0.4699 | -1.1575 |
| C  | -4.2711 | -1.0789 | 0.1811  |
| H  | -4.5519 | -2.1118 | -0.0154 |
| H  | -5.1374 | -0.5586 | 0.6011  |
| H  | -2.9318 | -0.1371 | 1.2970  |
| C  | -3.5348 | -1.3113 | -2.1423 |
| H  | -3.2248 | -2.2875 | -1.7867 |
| N  | -3.3925 | -1.0020 | -3.3910 |
| C  | -3.7990 | 0.2521  | -3.6590 |
| Fe | 0.3448  | 0.1518  | 0.1795  |
| O  | 1.0120  | -7.4451 | -0.0747 |
| C  | 1.7252  | -6.4729 | 0.2915  |
| O  | 2.8958  | -6.5685 | 0.7306  |
| C  | 1.0687  | -5.0943 | 0.2390  |
| H  | 0.3043  | -5.1015 | -0.5452 |
| H  | 0.5521  | -4.9811 | 1.1989  |
| C  | 2.0168  | -3.9101 | 0.0561  |
| H  | 2.8961  | -4.0803 | 0.6858  |
| H  | 2.3732  | -3.8145 | -0.9716 |
| C  | 1.3521  | -2.6210 | 0.4933  |
| O  | 1.4972  | -1.5633 | -0.1832 |
| O  | 0.6236  | -2.6953 | 1.5301  |

|     |         |         |         |                     |         |         |         |
|-----|---------|---------|---------|---------------------|---------|---------|---------|
| O   | -3.1677 | -1.0694 | 0.9967  | H                   | 2.4571  | -3.8140 | -1.0227 |
| O   | -0.1551 | -0.4282 | 2.1916  | C                   | 1.3499  | -2.5862 | 0.3476  |
| H   | 0.1212  | -1.4002 | 2.0447  | O                   | 1.4075  | -1.5893 | -0.4198 |
| H   | 0.4574  | -0.0755 | 2.8455  | O                   | 0.6668  | -2.5968 | 1.4277  |
| O   | -1.3558 | -2.2426 | -0.4969 | O                   | -3.7187 | -1.0116 | 1.0021  |
| H   | -0.8772 | -2.9144 | -0.0004 | O                   | 0.1325  | -0.2018 | 2.2032  |
| H   | -1.9388 | -1.8461 | 0.1785  | H                   | 0.3752  | -1.1640 | 2.0898  |
| C   | 0.0301  | 3.0700  | -4.6356 | H                   | 0.8810  | 0.2074  | 2.6485  |
| C   | -1.6469 | 3.3034  | 2.3451  | O                   | -1.3237 | -1.4538 | -0.0371 |
| C   | 5.6211  | 1.7840  | -0.7794 | H                   | -0.8638 | -2.1210 | 0.5065  |
| N   | -3.8205 | 0.8528  | -4.8704 | H                   | -2.2262 | -1.3779 | 0.3295  |
| Cps | 1.1830  | 4.0898  | -4.5829 | C                   | -0.0025 | 3.1340  | -4.7074 |
| Cps | -1.9388 | 4.5710  | 1.5391  | C                   | -1.6883 | 3.2433  | 2.2987  |
| Cps | 5.6568  | 2.1687  | -2.2679 | C                   | 5.4958  | 1.8116  | -0.7806 |
| Cps | -3.3463 | 0.2601  | -6.0814 | N                   | -3.8088 | 0.9031  | -4.9037 |
|     |         |         |         | Cps                 | 1.1860  | 4.1035  | -4.5900 |
|     |         |         |         | Cps                 | -1.9349 | 4.5408  | 1.5238  |
|     |         |         |         | Cps                 | 5.6445  | 2.1802  | -2.2674 |
|     |         |         |         | Cps                 | -3.3514 | 0.2639  | -6.0941 |
| I3  |         |         |         |                     |         |         |         |
| H   | -0.9476 | 3.6406  | -4.4848 |                     |         |         |         |
| H   | -0.1012 | 2.7708  | -5.7330 |                     |         |         |         |
| C   | 0.0316  | 1.9438  | -3.8217 | TS <sub>I3Pun</sub> |         |         |         |
| N   | 0.7412  | 0.7944  | -4.1094 |                     |         |         |         |
| H   | 1.2426  | 0.6122  | -4.9801 | H                   | -0.9448 | -3.6072 | 4.4589  |
| C   | 0.6960  | -0.0054 | -3.0250 | H                   | -0.0977 | 2.7244  | -5.6959 |
| H   | 1.1917  | -0.9606 | -2.9401 | C                   | 0.0392  | 1.9212  | -3.7763 |
| N   | -0.0112 | 0.5573  | -2.0616 | N                   | 0.7223  | 0.7572  | -4.0692 |
| C   | -0.4349 | 1.7665  | -2.5521 | H                   | 1.2200  | 0.5704  | -4.9408 |
| H   | -1.0144 | 2.4414  | -1.9396 | C                   | 0.6407  | -0.0574 | -3.0006 |
| H   | -0.6617 | 3.1797  | 2.6839  | H                   | 1.1068  | -1.0285 | -2.9292 |
| H   | -2.3509 | 3.1499  | 3.1622  | N                   | -0.0611 | 0.5101  | -2.0333 |
| C   | -1.8999 | 1.9738  | 1.4771  | C                   | -0.4482 | 1.7378  | -2.5150 |
| O   | -1.1813 | 1.7717  | 0.4714  | H                   | -1.0366 | 2.4151  | -1.9148 |
| O   | -2.8364 | 1.2067  | 1.8658  | H                   | -0.6900 | 3.2609  | 2.7951  |
| H   | 5.8999  | 0.8147  | -0.6057 | H                   | -2.4019 | 3.1889  | 3.1761  |
| H   | 6.0820  | 2.4818  | -0.1403 | C                   | -1.7955 | 2.0044  | 1.5585  |
| C   | 4.0995  | 1.7964  | -0.2483 | O                   | -1.1589 | 1.7796  | 0.5418  |
| N   | 3.4833  | 2.8726  | 0.3585  | O                   | -2.6541 | 1.1512  | 2.0887  |
| H   | 3.9356  | 3.7539  | 0.6123  | H                   | 5.8822  | 0.7965  | -0.6270 |
| C   | 2.2069  | 2.5355  | 0.6226  | H                   | 6.0302  | 2.4575  | -0.1316 |
| H   | 1.5094  | 3.1916  | 1.1187  | C                   | 4.0627  | 1.7478  | -0.2824 |
| N   | 1.9540  | 1.3000  | 0.2138  | N                   | 3.4499  | 2.7981  | 0.3710  |
| C   | 3.1335  | 0.8345  | -0.3260 | H                   | 3.9009  | 3.6764  | 0.6346  |
| H   | 3.2012  | -0.1607 | -0.7379 | C                   | 2.1809  | 2.4454  | 0.6476  |
| C   | -4.1448 | 2.2145  | -4.7452 | H                   | 1.4937  | 3.0770  | 1.1886  |
| H   | -4.1680 | 2.8986  | -5.5812 | N                   | 1.9266  | 1.2225  | 0.2023  |
| N   | -4.4315 | 2.5107  | -3.5008 | C                   | 3.0994  | 0.7822  | -0.3739 |
| C   | -4.2882 | 1.3291  | -2.8262 | H                   | 3.1664  | -0.2007 | -0.8153 |
| C   | -4.4034 | 1.0169  | -1.4529 | C                   | -4.3639 | 2.1927  | -4.8387 |
| N   | -4.5612 | 1.8795  | -0.4761 | H                   | -4.6024 | 2.7959  | -5.7028 |
| H   | -4.7940 | 2.8636  | -0.6232 | N                   | -4.5739 | 2.5424  | -3.5939 |
| H   | -4.3723 | 1.6404  | 0.4929  | C                   | -4.1239 | 1.4768  | -2.8537 |
| N   | -4.3335 | -0.3313 | -1.1960 | C                   | -4.0630 | 1.2193  | -1.4712 |
| C   | -4.7672 | -0.8666 | 0.1273  | N                   | -4.4044 | 2.0882  | -0.5159 |
| H   | -5.2105 | -1.8404 | -0.0731 | H                   | -4.8555 | 2.9831  | -0.6775 |
| H   | -5.5555 | -0.2002 | 0.4888  | H                   | -4.4132 | 1.7788  | 0.4416  |
| H   | -3.3766 | -0.1177 | 1.3140  | N                   | -3.5982 | 0.0116  | -1.1073 |
| C   | -3.9416 | -1.2428 | -2.1506 | C                   | -4.7816 | -1.0696 | 0.6303  |
| H   | -3.8474 | -2.2602 | -1.7875 | H                   | -5.0102 | -1.8879 | -0.0656 |
| N   | -3.6941 | -0.9779 | -3.3929 | H                   | -5.5111 | -0.2473 | 0.6499  |
| C   | -3.9148 | 0.3164  | -3.6911 | H                   | -2.8241 | 0.3383  | 1.5617  |
| Fe  | 0.1303  | 0.1490  | 0.0186  | C                   | -3.1666 | -0.8629 | -2.0353 |
| O   | 1.0650  | -7.4290 | -0.0722 | H                   | -2.7871 | -1.8011 | -1.6424 |
| C   | 1.7819  | -6.4467 | 0.2632  | N                   | -3.1340 | -0.7083 | -3.3430 |
| O   | 2.9555  | -6.5340 | 0.6962  | C                   | -3.6429 | 0.4789  | -3.6848 |
| C   | 1.1175  | -5.0731 | 0.1706  | Fe                  | 0.1152  | 0.0423  | 0.0243  |
| H   | 0.3736  | -5.1054 | -0.6315 | O                   | 1.0597  | -7.4971 | -0.0730 |
| H   | 0.5729  | -4.9453 | 1.1130  | C                   | 1.7525  | -6.4995 | 0.2655  |
| C   | 2.0552  | -3.8793 | -0.0093 | O                   | 2.9239  | -6.5532 | 0.7078  |
| H   | 2.9037  | -4.0130 | 0.6693  |                     |         |         |         |



|                 |         |         |         |                   |         |         |         |
|-----------------|---------|---------|---------|-------------------|---------|---------|---------|
| C               | 1.0549  | -5.1435 | 0.1611  | C                 | -3.4733 | 0.3025  | -3.6643 |
| H               | 0.3265  | -5.1927 | -0.6542 | Fe                | 0.3637  | 0.2124  | 0.1433  |
| H               | 0.4954  | -5.0296 | 1.0967  | O                 | 1.0169  | -7.4530 | -0.0654 |
| C               | 1.9789  | -3.9398 | -0.0075 | C                 | 1.7045  | -6.4605 | 0.2975  |
| H               | 2.8272  | -4.0786 | 0.6696  | O                 | 2.8859  | -6.5196 | 0.7136  |
| H               | 2.3755  | -3.8622 | -1.0218 | C                 | 0.9889  | -5.1109 | 0.2562  |
| C               | 1.2694  | -2.6599 | 0.3652  | H                 | 0.2432  | -5.1463 | -0.5440 |
| O               | 1.2841  | -1.6725 | -0.4218 | H                 | 0.4457  | -5.0261 | 1.2044  |
| O               | 0.6383  | -2.6531 | 1.4750  | C                 | 1.8825  | -3.8879 | 0.0919  |
| O               | -3.8665 | -1.1521 | 1.4445  | H                 | 2.7253  | -3.9838 | 0.7849  |
| O               | 0.2286  | -0.1955 | 2.2548  | H                 | 2.3030  | -3.8141 | -0.9132 |
| H               | 0.4310  | -1.1655 | 2.1665  | C                 | 1.1370  | -2.6139 | 0.4243  |
| H               | 1.0178  | 0.1977  | 2.6421  | O                 | 1.2459  | -1.6205 | -0.3545 |
| O               | -1.4189 | -1.4536 | 0.3595  | O                 | 0.4252  | -2.6044 | 1.4785  |
| H               | -0.9171 | -2.1352 | 0.8507  | O                 | -4.7431 | -0.1399 | 1.8125  |
| H               | -2.3445 | -1.4903 | 0.6603  | O                 | 0.6571  | -0.1249 | 2.3497  |
| C               | 0.0026  | 3.1050  | -4.6769 | H                 | 0.6394  | -1.1083 | 2.2988  |
| C               | -1.6939 | 3.2874  | 2.3502  | H                 | 1.5218  | 0.1170  | 2.6945  |
| C               | 5.4685  | 1.7905  | -0.7964 | O                 | -1.4814 | -0.8127 | 0.7668  |
| N               | -3.7965 | 0.9558  | -4.9399 | H                 | -1.1641 | -1.7103 | 0.9931  |
| Cps             | 1.1848  | 4.0903  | -4.5811 | H                 | -2.2561 | -0.7410 | 0.0808  |
| Cps             | -1.9387 | 4.5431  | 1.5259  | C                 | -0.0049 | 3.0993  | -4.6591 |
| Cps             | 5.6499  | 2.1828  | -2.2732 | C                 | -1.6209 | 3.4139  | 2.4399  |
| Cps             | -3.3475 | 0.2650  | -6.1047 | C                 | 5.6572  | 1.7804  | -0.8094 |
|                 |         |         |         | N                 | -3.7705 | 0.8482  | -4.8664 |
|                 |         |         |         | Cps               | 1.1701  | 4.0941  | -4.5836 |
|                 |         |         |         | Cps               | -1.9347 | 4.5932  | 1.5419  |
|                 |         |         |         | Cps               | 5.6668  | 2.1790  | -2.2925 |
|                 |         |         |         | Cps               | -3.3517 | 0.2608  | -6.0958 |
| P <sub>un</sub> |         |         |         | TS <sub>12P</sub> |         |         |         |
| H               | -0.9555 | 3.5979  | -4.4462 | H                 | -0.9375 | 3.5268  | -4.4796 |
| H               | -0.1069 | 2.6967  | -5.6695 | H                 | -0.0402 | 2.6267  | -5.6697 |
| C               | 0.0580  | 1.9399  | -3.7306 | C                 | 0.1012  | 1.9067  | -3.7203 |
| N               | 0.7403  | 0.7733  | -4.0123 | N                 | 0.8053  | 0.7482  | -3.9719 |
| H               | 1.2060  | 0.5636  | -4.8960 | H                 | 1.2946  | 0.5355  | -4.8416 |
| C               | 0.7264  | 0.0036  | -2.9080 | C                 | 0.7572  | -0.0196 | -2.8665 |
| H               | 1.2034  | -0.9610 | -2.8232 | H                 | 1.2343  | -0.9818 | -2.7611 |
| N               | 0.0704  | 0.6042  | -1.9276 | N                 | 0.0569  | 0.5753  | -1.9160 |
| C               | -0.3580 | 1.8058  | -2.4379 | C                 | -0.3661 | 1.7690  | -2.4455 |
| H               | -0.9191 | 2.5020  | -1.8330 | H                 | -0.9691 | 2.4558  | -1.8715 |
| H               | -0.6738 | 3.5393  | 2.9868  | H                 | -0.8106 | 3.3200  | 2.9400  |
| H               | -2.3826 | 3.2407  | 3.2045  | H                 | -2.5482 | 3.1958  | 3.1187  |
| C               | -1.4335 | 2.1096  | 1.7298  | C                 | -1.6898 | 2.0279  | 1.6092  |
| O               | -0.7877 | 1.9998  | 0.6903  | O                 | -0.9532 | 1.8644  | 0.6396  |
| O               | -1.9859 | 1.0908  | 2.3370  | O                 | -2.4356 | 1.0645  | 2.0931  |
| H               | 6.0921  | 0.7890  | -0.6830 | H                 | 5.9167  | 0.7748  | -0.6521 |
| H               | 6.2788  | 2.4519  | -0.2047 | H                 | 6.0823  | 2.4328  | -0.1543 |
| C               | 4.3042  | 1.7433  | -0.1920 | C                 | 4.1132  | 1.7307  | -0.2552 |
| N               | 3.7048  | 2.8281  | 0.4128  | N                 | 3.5288  | 2.7731  | 0.4358  |
| H               | 4.1614  | 3.7120  | 0.6494  | H                 | 3.9852  | 3.6524  | 0.6859  |
| C               | 2.4285  | 2.5114  | 0.6848  | C                 | 2.2729  | 2.4152  | 0.7628  |
| H               | 1.7343  | 3.1722  | 1.1781  | H                 | 1.6017  | 3.0414  | 1.3298  |
| N               | 2.1655  | 1.2780  | 0.2813  | N                 | 2.0006  | 1.1996  | 0.3122  |
| C               | 3.3307  | 0.7903  | -0.2609 | C                 | 3.1448  | 0.7685  | -0.3202 |
| H               | 3.3822  | -0.2033 | -0.6807 | H                 | 3.1954  | -0.2077 | -0.7787 |
| C               | -4.4160 | 2.0226  | -4.6302 | C                 | -4.5807 | 2.0479  | -4.7592 |
| H               | -4.7604 | 2.6586  | -5.4337 | H                 | -4.9416 | 2.6133  | -5.6060 |
| N               | -4.5465 | 2.2702  | -3.3471 | N                 | -4.7699 | 2.3688  | -3.5023 |
| C               | -3.9565 | 1.1922  | -2.7220 | C                 | -4.1284 | 1.3833  | -2.7872 |
| C               | -3.7348 | 0.8492  | -1.3668 | C                 | -3.9688 | 1.1196  | -1.4093 |
| N               | -4.0584 | 1.6050  | -0.3179 | N                 | -4.4382 | 1.8842  | -0.4189 |
| H               | -4.6308 | 2.4437  | -0.4112 | H                 | -5.0123 | 2.7124  | -0.5475 |
| H               | -4.1070 | 1.1196  | 0.5774  | H                 | -4.4035 | 1.5054  | 0.5130  |
| N               | -3.1037 | -0.3303 | -1.1476 | N                 | -3.2565 | 0.0257  | -1.0794 |
| C               | -5.8935 | 0.1534  | 2.0625  | C                 | -2.7565 | -1.9952 | 0.7014  |
| H               | -6.5230 | -0.4874 | 2.7008  | H                 | -2.6618 | -2.6465 | -0.1653 |
| H               | -6.3562 | 1.0706  | 1.6664  | H                 | -3.7097 | -2.0310 | 1.2392  |
| H               | -1.7819 | 0.2620  | 1.7875  |                   |         |         |         |
| C               | -2.7020 | -1.0948 | -2.1784 |                   |         |         |         |
| H               | -2.1905 | -2.0128 | -1.8978 |                   |         |         |         |
| N               | -2.8351 | -0.8572 | -3.4635 |                   |         |         |         |

|     |         |         |         |    |         |         |         |
|-----|---------|---------|---------|----|---------|---------|---------|
| H   | -2.2614 | 0.1997  | 1.5991  | N  | -3.1037 | -0.3303 | -1.1476 |
| C   | -2.7143 | -0.7288 | -2.0453 | C  | -5.8935 | 0.1534  | 2.0625  |
| H   | -2.0961 | -1.5561 | -1.7090 | H  | -6.5230 | -0.4874 | 2.7008  |
| N   | -2.8056 | -0.5963 | -3.3544 | H  | -6.3562 | 1.0706  | 1.6664  |
| C   | -3.5402 | 0.4762  | -3.6523 | H  | -1.7819 | 0.2620  | 1.7875  |
| Fe  | 0.1564  | 0.1100  | 0.1583  | C  | -2.7020 | -1.0948 | -2.1784 |
| O   | 1.0450  | -7.4997 | -0.1635 | H  | -2.1905 | -2.0128 | -1.8978 |
| C   | 1.7274  | -6.4734 | 0.1108  | N  | -2.8351 | -0.8572 | -3.4635 |
| O   | 2.8570  | -6.4761 | 0.6484  | C  | -3.4733 | 0.3025  | -3.6643 |
| C   | 1.0356  | -5.1529 | -0.2464 | Fe | 0.3637  | 0.2124  | 0.1433  |
| H   | 0.6158  | -5.2559 | -1.2513 | O  | 1.0169  | -7.4530 | -0.0654 |
| H   | 0.1842  | -5.0893 | 0.4351  | C  | 1.7045  | -6.4605 | 0.2975  |
| C   | 1.8826  | -3.8893 | -0.1266 | O  | 2.8859  | -6.5196 | 0.7136  |
| H   | 2.6732  | -4.1026 | 0.5997  | C  | 0.9889  | -5.1109 | 0.2562  |
| H   | 2.3561  | -3.6184 | -1.0720 | H  | 0.2432  | -5.1463 | -0.5440 |
| C   | 1.0795  | -2.7218 | 0.3930  | H  | 0.4457  | -5.0261 | 1.2044  |
| O   | 1.0174  | -1.6652 | -0.3068 | C  | 1.8825  | -3.8879 | 0.0919  |
| O   | 0.5078  | -2.8389 | 1.5179  | H  | 2.7253  | -3.9838 | 0.7849  |
| O   | -1.8819 | -1.1878 | 1.0113  | H  | 2.3030  | -3.8141 | -0.9132 |
| O   | 0.2583  | -0.3682 | 2.2840  | C  | 1.1370  | -2.6139 | 0.4243  |
| H   | 0.2613  | -1.3602 | 2.1584  | O  | 1.2459  | -1.6205 | -0.3545 |
| H   | 1.1014  | -0.1584 | 2.6988  | O  | 0.4252  | -2.6044 | 1.4785  |
| O   | -1.9579 | -4.0609 | 1.4595  | O  | -4.7431 | -0.1399 | 1.8125  |
| H   | -1.0503 | -3.7784 | 1.6705  | O  | 0.6571  | -0.1249 | 2.3497  |
| H   | -2.2746 | -4.6095 | 2.2042  | H  | 0.6394  | -1.1083 | 2.2988  |
| C   | 0.0302  | 3.0521  | -4.6659 | H  | 1.5218  | 0.1170  | 2.6945  |
| C   | -1.7557 | 3.3209  | 2.3771  | O  | -1.4814 | -0.8127 | 0.7668  |
| C   | 5.5023  | 1.7707  | -0.8085 | H  | -1.1641 | -1.7103 | 0.9931  |
| N   | -3.8437 | 0.9079  | -4.8956 | H  | -2.2561 | -0.7410 | 0.0808  |
| Cps | 1.1745  | 4.0829  | -4.5903 | C  | -0.0049 | 3.0993  | -4.6591 |
| Cps | -1.9323 | 4.5753  | 1.5405  | C  | -1.6209 | 3.4139  | 2.4399  |
| Cps | 5.6517  | 2.1689  | -2.2870 | C  | 5.6572  | 1.7804  | -0.8094 |
| Cps | -3.3628 | 0.2592  | -6.0728 | N  | -3.7705 | 0.8482  | -4.8664 |

P

|   |         |         |         |
|---|---------|---------|---------|
| H | -0.9555 | 3.5979  | -4.4462 |
| H | -0.1069 | 2.6967  | -5.6695 |
| C | 0.0580  | 1.9399  | -3.7306 |
| N | 0.7403  | 0.7733  | -4.0123 |
| H | 1.2060  | 0.5636  | -4.8960 |
| C | 0.7264  | 0.0036  | -2.9080 |
| H | 1.2034  | -0.9610 | -2.8232 |
| N | 0.0704  | 0.6042  | -1.9276 |
| C | -0.3580 | 1.8058  | -2.4379 |
| H | -0.9191 | 2.5020  | -1.8330 |
| H | -0.6738 | 3.5393  | 2.9868  |
| H | -2.3826 | 3.2407  | 3.2045  |
| C | -1.4335 | 2.1096  | 1.7298  |
| O | -0.7877 | 1.9998  | 0.6903  |
| O | -1.9859 | 1.0908  | 2.3370  |
| H | 6.0921  | 0.7890  | -0.6830 |
| H | 6.2788  | 2.4519  | -0.2047 |
| C | 4.3042  | 1.7433  | -0.1920 |
| N | 3.7048  | 2.8281  | 0.4128  |
| H | 4.1614  | 3.7120  | 0.6494  |
| C | 2.4285  | 2.5114  | 0.6848  |
| H | 1.7343  | 3.1722  | 1.1781  |
| N | 2.1655  | 1.2780  | 0.2813  |
| C | 3.3307  | 0.7903  | -0.2609 |
| H | 3.3822  | -0.2033 | -0.6807 |
| C | -4.4160 | 2.0226  | -4.6302 |
| H | -4.7604 | 2.6586  | -5.4337 |
| N | -4.5465 | 2.2702  | -3.3471 |
| C | -3.9565 | 1.1922  | -2.7220 |
| C | -3.7348 | 0.8492  | -1.3668 |
| N | -4.0584 | 1.6050  | -0.3179 |
| H | -4.6308 | 2.4437  | -0.4112 |
| H | -4.1070 | 1.1196  | 0.5774  |

Structures for 1-deazameA

Figure 7b

|   |         |         |         |
|---|---------|---------|---------|
| H | -0.8094 | 3.7669  | -4.4538 |
| H | 0.0277  | 2.8304  | -5.6587 |
| C | 0.1042  | 2.0725  | -3.7138 |
| N | 0.7141  | 0.8623  | -3.9889 |
| H | 1.1845  | 0.6246  | -4.8576 |
| C | 0.5896  | 0.0804  | -2.8929 |
| H | 0.9862  | -0.9179 | -2.7830 |
| N | -0.0582 | 0.7145  | -1.9361 |
| C | -0.3749 | 1.9478  | -2.4400 |
| H | -0.9084 | 2.6624  | -1.8309 |
| H | -0.6834 | 3.6168  | 2.8290  |
| H | -2.4126 | 3.4802  | 3.1364  |
| C | -1.7139 | 2.2657  | 1.5711  |
| O | -0.8921 | 2.1272  | 0.6225  |
| O | -2.5861 | 1.4459  | 1.9326  |
| H | 5.9044  | 0.8252  | -0.6141 |
| H | 6.0871  | 2.4885  | -0.1358 |
| C | 4.1054  | 1.8125  | -0.2632 |
| N | 3.4963  | 2.9083  | 0.3215  |
| H | 3.9488  | 3.7958  | 0.5372  |
| C | 2.2161  | 2.5744  | 0.6015  |
| H | 1.5034  | 3.2388  | 1.0662  |
| N | 1.9629  | 1.3345  | 0.2315  |
| C | 3.1318  | 0.8516  | -0.2994 |
| H | 3.1762  | -0.1525 | -0.6950 |
| C | -4.3240 | 2.0790  | -4.7264 |
| H | -4.5800 | 2.7487  | -5.5359 |

|     |         |         |         |
|-----|---------|---------|---------|
| N   | -4.4928 | 2.3258  | -3.4469 |
| C   | -4.0187 | 1.1933  | -2.8009 |
| C   | -3.8964 | 0.8815  | -1.4245 |
| N   | -4.2731 | 1.7497  | -0.4594 |
| H   | -4.5633 | 2.6776  | -0.7251 |
| H   | -3.8804 | 1.6460  | 0.4714  |
| C   | -3.3727 | -0.4066 | -1.1801 |
| C   | -3.1776 | -0.9853 | 0.1978  |
| H   | -3.7935 | -1.8881 | 0.2938  |
| H   | -3.4715 | -0.2812 | 0.9728  |
| H   | -1.9086 | -3.0533 | 0.4767  |
| C   | -2.9649 | -1.2189 | -2.2443 |
| H   | -2.5401 | -2.1885 | -1.9926 |
| N   | -3.0240 | -0.9259 | -3.5444 |
| C   | -3.5644 | 0.2719  | -3.7349 |
| Fe  | 0.0792  | 0.2331  | 0.2173  |
| O   | 0.9877  | -7.2262 | -0.0703 |
| C   | 1.7321  | -6.3335 | 0.4206  |
| O   | 2.9453  | -6.5415 | 0.7155  |
| C   | 1.1651  | -4.9391 | 0.6850  |
| H   | 0.0771  | -4.9439 | 0.5954  |
| H   | 1.4117  | -4.6683 | 1.7157  |
| C   | 1.7506  | -3.8530 | -0.2328 |
| H   | 2.8414  | -3.9732 | -0.2617 |
| H   | 1.3765  | -3.9587 | -1.2547 |
| C   | 1.4444  | -2.4337 | 0.2750  |
| O   | 1.0498  | -1.5705 | -0.5711 |
| O   | 1.6201  | -2.2008 | 1.4882  |
| O   | -1.8171 | -1.3599 | 0.3665  |
| O   | -0.3604 | -0.3478 | 2.0606  |
| H   | 0.3278  | -1.0153 | 2.2094  |
| H   | -1.3899 | -1.0214 | 1.2457  |
| O   | -2.2634 | -3.9637 | 0.5567  |
| H   | -2.3397 | -4.1477 | 1.4991  |
| C   | 0.1244  | 3.2269  | -4.6438 |
| C   | -1.6692 | 3.5806  | 2.3398  |
| C   | 5.5028  | 1.8238  | -0.7855 |
| N   | -3.7702 | 0.8602  | -4.9491 |
| Cps | 1.3387  | 4.1842  | -4.5528 |
| Cps | -1.9228 | 4.8179  | 1.4757  |
| Cps | 5.6872  | 2.2031  | -2.2706 |
| Cps | -3.3353 | 0.2690  | -6.1768 |

Figure 7c

|   |         |         |         |
|---|---------|---------|---------|
| H | -0.7663 | 3.7778  | -4.4589 |
| H | 0.0826  | 2.8677  | -5.6762 |
| C | 0.1867  | 2.0937  | -3.7351 |
| N | 0.8310  | 0.9034  | -4.0178 |
| H | 1.2867  | 0.6751  | -4.8974 |
| C | 0.7788  | 0.1368  | -2.9024 |
| H | 1.2226  | -0.8429 | -2.7995 |
| N | 0.1424  | 0.7592  | -1.9348 |
| C | -0.2396 | 1.9694  | -2.4424 |
| H | -0.7753 | 2.6755  | -1.8247 |
| H | -0.7783 | 3.8882  | 3.1167  |
| H | -2.4408 | 3.4285  | 3.1428  |
| C | -1.2131 | 2.2697  | 1.9270  |
| O | -0.7012 | 2.1699  | 0.7752  |
| O | -1.3636 | 1.3667  | 2.7766  |
| H | 6.0966  | 0.8750  | -0.6939 |
| H | 6.2769  | 2.5435  | -0.2321 |
| C | 4.2972  | 1.8468  | -0.2805 |
| N | 3.6885  | 2.9424  | 0.3012  |
| H | 4.1454  | 3.8215  | 0.5404  |
| C | 2.3986  | 2.6190  | 0.5459  |

|     |         |         |         |
|-----|---------|---------|---------|
| H   | 1.6844  | 3.2801  | 1.0128  |
| N   | 2.1426  | 1.3918  | 0.1449  |
| C   | 3.3149  | 0.8995  | -0.3605 |
| H   | 3.3595  | -0.1046 | -0.7563 |
| C   | -4.1764 | 2.2159  | -4.7776 |
| H   | -4.2314 | 2.8919  | -5.6198 |
| N   | -4.4408 | 2.5205  | -3.5301 |
| C   | -4.2374 | 1.3448  | -2.8281 |
| C   | -4.3192 | 1.0582  | -1.4497 |
| N   | -4.5793 | 1.9675  | -0.4877 |
| H   | -4.6845 | 2.9490  | -0.6934 |
| H   | -4.2933 | 1.7001  | 0.4465  |
| C   | -4.1175 | -0.3027 | -1.1320 |
| C   | -4.3064 | -0.7472 | 0.2952  |
| H   | -4.1412 | -1.8343 | 0.3490  |
| H   | -5.3473 | -0.5595 | 0.5912  |
| H   | -2.4947 | -0.3053 | 0.8652  |
| C   | -3.7370 | -1.2052 | -2.1226 |
| H   | -3.5339 | -2.2297 | -1.8184 |
| N   | -3.5810 | -0.9441 | -3.4279 |
| C   | -3.8586 | 0.3239  | -3.6980 |
| Fe  | 0.2404  | 0.2771  | 0.1956  |
| O   | 1.0285  | -7.4599 | -0.0499 |
| C   | 1.7400  | -6.4747 | 0.3087  |
| O   | 2.9078  | -6.5943 | 0.7577  |
| C   | 1.0990  | -5.0954 | 0.2269  |
| H   | 0.2951  | -5.1333 | -0.5145 |
| H   | 0.6261  | -4.9175 | 1.2003  |
| C   | 2.0206  | -3.9128 | -0.0601 |
| H   | 2.9388  | -4.0394 | 0.5263  |
| H   | 2.3143  | -3.8688 | -1.1130 |
| C   | 1.3714  | -2.5809 | 0.3485  |
| O   | 1.5204  | -1.5811 | -0.3987 |
| O   | 0.7289  | -2.6012 | 1.4381  |
| O   | -3.4653 | -0.0544 | 1.1916  |
| O   | 0.7884  | -0.0593 | 2.3113  |
| H   | 0.6991  | -1.0274 | 2.2207  |
| H   | -0.0659 | 0.3025  | 2.6409  |
| O   | -1.3239 | -0.8785 | 0.3258  |
| H   | -1.0315 | -1.6716 | 0.7883  |
| C   | 0.1752  | 3.2541  | -4.6567 |
| C   | -1.6208 | 3.6428  | 2.4478  |
| C   | 5.6712  | 1.8667  | -0.8489 |
| N   | -3.8154 | 0.9161  | -4.9318 |
| Cps | 1.3780  | 4.2246  | -4.5526 |
| Cps | -1.9327 | 4.7808  | 1.4849  |
| Cps | 5.7621  | 2.2412  | -2.3424 |
| Cps | -3.3508 | 0.2711  | -6.1245 |

Figure 7d

|   |         |         |         |
|---|---------|---------|---------|
| H | -0.8014 | 3.7986  | -4.4992 |
| H | 0.0449  | 2.8827  | -5.7136 |
| C | 0.0872  | 2.0825  | -3.7847 |
| N | 0.7178  | 0.8831  | -4.0597 |
| H | 1.2086  | 0.6593  | -4.9213 |
| C | 0.5704  | 0.0850  | -2.9789 |
| H | 0.9773  | -0.9098 | -2.8730 |
| N | -0.1120 | 0.6982  | -2.0339 |
| C | -0.4278 | 1.9342  | -2.5283 |
| H | -0.9851 | 2.6385  | -1.9283 |
| H | -0.6789 | 3.6525  | 2.8579  |
| H | -2.4031 | 3.4868  | 3.1484  |
| C | -1.6511 | 2.2387  | 1.6473  |
| O | -0.9252 | 2.1005  | 0.6250  |
| O | -2.3893 | 1.3671  | 2.1556  |
| H | 5.8696  | 0.8232  | -0.6231 |

|     |         |         |         |    |         |         |         |
|-----|---------|---------|---------|----|---------|---------|---------|
| H   | 6.0185  | 2.4863  | -0.1315 | C  | -0.4388 | 1.7868  | -2.5325 |
| C   | 4.0490  | 1.7868  | -0.3189 | H  | -1.0135 | 2.4728  | -1.9276 |
| N   | 3.4246  | 2.8559  | 0.2979  | H  | -0.8066 | 3.3106  | 2.8111  |
| H   | 3.8665  | 3.7404  | 0.5425  | H  | -2.5467 | 3.2752  | 3.1023  |
| C   | 2.1407  | 2.5015  | 0.5437  | C  | -1.8625 | 2.0165  | 1.5504  |
| H   | 1.4179  | 3.1413  | 1.0266  | O  | -1.1506 | 1.8531  | 0.5218  |
| N   | 1.8975  | 1.2778  | 0.1185  | O  | -2.6471 | 1.1515  | 2.0231  |
| C   | 3.0781  | 0.8250  | -0.4126 | H  | 5.8524  | 0.8136  | -0.5488 |
| H   | 3.1381  | -0.1647 | -0.8408 | H  | 6.0161  | 2.4814  | -0.0822 |
| C   | -4.3325 | 2.0632  | -4.6899 | C  | 4.0421  | 1.7818  | -0.2091 |
| H   | -4.6241 | 2.7196  | -5.4984 | N  | 3.4181  | 2.8555  | 0.3951  |
| N   | -4.4689 | 2.3208  | -3.4089 | H  | 3.8602  | 3.7458  | 0.6336  |
| C   | -3.9504 | 1.2063  | -2.7648 | C  | 2.1476  | 2.5068  | 0.6715  |
| C   | -3.7835 | 0.9087  | -1.3899 | H  | 1.4443  | 3.1591  | 1.1648  |
| N   | -4.1508 | 1.7738  | -0.4189 | N  | 1.9062  | 1.2656  | 0.2752  |
| H   | -4.5157 | 2.6851  | -0.6469 | C  | 3.0860  | 0.8082  | -0.2705 |
| H   | -3.8139 | 1.6311  | 0.5233  | H  | 3.1581  | -0.1900 | -0.6745 |
| C   | -3.2190 | -0.3630 | -1.1438 | C  | -4.0480 | 2.2358  | -4.7732 |
| C   | -2.9766 | -0.9140 | 0.2454  | H  | -4.0469 | 2.8970  | -5.6276 |
| H   | -3.4884 | -1.8874 | 0.3025  | N  | -4.3426 | 2.5713  | -3.5411 |
| H   | -3.4657 | -0.2638 | 0.9795  | C  | -4.2295 | 1.4049  | -2.8339 |
| H   | -1.5974 | -2.8204 | 0.4872  | C  | -4.4524 | 1.1390  | -1.4587 |
| C   | -2.8226 | -1.1748 | -2.2116 | N  | -4.6851 | 2.0637  | -0.5576 |
| H   | -2.3693 | -2.1320 | -1.9592 | H  | -4.7210 | 3.0320  | -0.8527 |
| N   | -2.9286 | -0.8988 | -3.5144 | H  | -4.9264 | 1.9012  | 0.4386  |
| C   | -3.5021 | 0.2837  | -3.7031 | N  | -4.4168 | -0.1977 | -1.1531 |
| Fe  | -0.1307 | 0.1573  | 0.0598  | C  | -4.8376 | -0.6942 | 0.1980  |
| O   | 1.0340  | -7.2438 | -0.0769 | H  | -5.3410 | -1.6424 | 0.0130  |
| C   | 1.7804  | -6.3426 | 0.3982  | H  | -5.5632 | 0.0162  | 0.5948  |
| O   | 2.9908  | -6.5474 | 0.7022  | H  | -3.4113 | -0.0340 | 1.4165  |
| C   | 1.2172  | -4.9458 | 0.6400  | C  | -4.0190 | -1.1432 | -2.0739 |
| H   | 0.1349  | -4.9308 | 0.5155  | H  | -3.9676 | -2.1513 | -1.6778 |
| H   | 1.4298  | -4.6828 | 1.6801  | N  | -3.7187 | -0.9305 | -3.3169 |
| C   | 1.8377  | -3.8610 | -0.2551 | C  | -3.8755 | 0.3614  | -3.6656 |
| H   | 2.9303  | -3.9601 | -0.2188 | Fe | 0.0598  | 0.1650  | 0.0687  |
| H   | 1.5243  | -3.9847 | -1.2949 | O  | 1.1145  | -7.4896 | -0.0418 |
| C   | 1.4738  | -2.4454 | 0.2147  | C  | 1.8082  | -6.4909 | 0.2988  |
| O   | 1.0672  | -1.6074 | -0.6408 | O  | 2.9717  | -6.5553 | 0.7588  |
| O   | 1.6348  | -2.1986 | 1.4347  | C  | 1.1151  | -5.1337 | 0.1783  |
| O   | -1.6199 | -1.0966 | 0.5415  | H  | 0.3848  | -5.1927 | -0.6344 |
| O   | 0.2007  | -0.1749 | 2.2687  | H  | 0.5512  | -5.0129 | 1.1102  |
| H   | 0.8441  | -0.9018 | 2.0838  | C  | 2.0166  | -3.9122 | 0.0055  |
| H   | -0.6607 | -0.6052 | 2.1288  | H  | 2.8599  | -4.0205 | 0.6961  |
| O   | -1.8682 | -3.7728 | 0.5106  | H  | 2.4296  | -3.8356 | -1.0028 |
| H   | -2.0379 | -3.9656 | 1.4382  | C  | 1.2702  | -2.6365 | 0.3551  |
| C   | 0.1303  | 3.2543  | -4.6886 | O  | 1.3335  | -1.6248 | -0.3901 |
| C   | -1.6575 | 3.5902  | 2.3544  | O  | 0.5611  | -2.6820 | 1.4179  |
| C   | 5.4619  | 1.8183  | -0.8015 | O  | -3.7753 | -0.8938 | 1.0406  |
| N   | -3.7606 | 0.8542  | -4.9180 | O  | 0.0045  | -0.3379 | 2.2543  |
| Cps | 1.3527  | 4.1951  | -4.5596 | H  | 0.2750  | -1.2886 | 2.0872  |
| Cps | -1.9241 | 4.8118  | 1.4765  | H  | 0.6841  | 0.0504  | 2.8128  |
| Cps | 5.6890  | 2.2033  | -2.2799 | O  | -1.4134 | -1.4081 | -0.0283 |
| Cps | -3.3447 | 0.2687  | -6.1565 | H  | -0.9716 | -2.1114 | 0.4811  |
|     |         |         |         | H  | -2.2971 | -1.2906 | 0.3792  |
|     |         |         |         | H  | -5.1892 | 2.7815  | 7.1494  |
|     |         |         |         | H  | -6.7219 | 3.2584  | 6.5331  |
|     |         |         |         | C  | -5.0714 | 3.4330  | 5.2028  |
|     |         |         |         | O  | -5.6262 | 2.5082  | 4.5075  |
|     |         |         |         | O  | -4.0780 | 4.0896  | 4.8565  |
|     |         |         |         | H  | -4.0448 | -2.3573 | 5.6567  |
|     |         |         |         | C  | -3.4680 | -0.6965 | 4.6894  |
|     |         |         |         | N  | -3.6008 | 0.6161  | 4.5464  |
|     |         |         |         | H  | -4.4328 | 1.0638  | 4.9261  |
|     |         |         |         | H  | -3.2331 | 1.0356  | 3.6902  |
|     |         |         |         | N  | -2.5837 | -1.3665 | 3.9386  |
|     |         |         |         | H  | -2.5132 | -2.3726 | 4.0317  |
|     |         |         |         | H  | -1.9658 | -0.8717 | 3.3059  |
|     |         |         |         | O  | -5.7470 | 1.9213  | 1.9773  |
|     |         |         |         | H  | -5.5362 | 2.1490  | 2.9332  |
|     |         |         |         | H  | -6.6816 | 1.6868  | 1.9633  |

Structures for proton being transferred to Glu136

<sup>13</sup>Glu136

|   |         |         |         |
|---|---------|---------|---------|
| H | -0.9242 | 3.6422  | -4.4912 |
| H | -0.0723 | 2.7554  | -5.7247 |
| C | 0.0378  | 1.9475  | -3.8015 |
| N | 0.7383  | 0.7882  | -4.0733 |
| H | 1.2445  | 0.5943  | -4.9378 |
| C | 0.6763  | -0.0003 | -2.9799 |
| H | 1.1606  | -0.9605 | -2.8813 |
| N | -0.0314 | 0.5782  | -2.0270 |

|     |         |         |         |   |         |         |         |
|-----|---------|---------|---------|---|---------|---------|---------|
| C   | 0.0198  | 3.1283  | -4.7016 | O | 1.2017  | -1.6241 | -0.3477 |
| C   | -1.7902 | 3.3334  | 2.3149  | O | 0.3815  | -2.6552 | 1.4612  |
| C   | 5.4426  | 1.8074  | -0.7300 | O | -4.0963 | -0.2983 | 1.2523  |
| N   | -3.7443 | 0.9135  | -4.8973 | O | 0.6674  | -0.1727 | 2.3040  |
| C   | -5.6837 | 3.5961  | 6.5927  | H | 0.6178  | -1.1529 | 2.2555  |
| N   | -4.1900 | -1.3503 | 5.5850  | H | 1.5776  | 0.0396  | 2.5288  |
| Cps | 1.2133  | 4.0941  | -4.5834 | O | -1.5587 | -1.0272 | 0.4159  |
| Cps | -1.9727 | 4.5858  | 1.4583  | H | -1.1364 | -1.7629 | 0.9053  |
| Cps | 5.6144  | 2.1767  | -2.2145 | H | -2.1541 | -0.5501 | 1.0256  |
| Cps | -3.3111 | 0.2475  | -6.0862 | H | -5.2002 | 2.7510  | 7.1045  |
| Cps | -5.5222 | 4.9369  | 7.2924  | H | -6.7436 | 3.2318  | 6.5178  |
| Cps | -5.1167 | -0.7070 | 6.5039  | C | -5.1140 | 3.4155  | 5.1636  |

I3' Glu136

|    |         |         |         |                          |         |         |         |
|----|---------|---------|---------|--------------------------|---------|---------|---------|
| H  | -0.9306 | 3.6371  | -4.4705 | O                        | -5.6845 | 2.4891  | 4.4728  |
| H  | -0.0828 | 2.7330  | -5.6938 | O                        | -4.1305 | 4.0694  | 4.7992  |
| C  | 0.0359  | 1.9532  | -3.7594 | H                        | -4.1202 | -2.3658 | 5.6528  |
| N  | 0.7215  | 0.7842  | -4.0284 | C                        | -3.4983 | -0.7107 | 4.7066  |
| H  | 1.2218  | 0.5807  | -4.8936 | N                        | -3.6121 | 0.6005  | 4.5501  |
| C  | 0.6601  | 0.0057  | -2.9266 | H                        | -4.4370 | 1.0758  | 4.9030  |
| H  | 1.1337  | -0.9596 | -2.8258 | H                        | -3.0492 | 1.0379  | 3.8127  |
| N  | -0.0311 | 0.5990  | -1.9708 | N                        | -2.6087 | -1.3829 | 3.9679  |
| C  | -0.4285 | 1.8081  | -2.4830 | H                        | -2.5124 | -2.3849 | 4.0745  |
| H  | -0.9848 | 2.5066  | -1.8749 | H                        | -2.0667 | -0.8648 | 3.2890  |
| H  | -0.7905 | 3.4809  | 2.9898  | O                        | -5.6500 | 1.7566  | 2.0713  |
| H  | -2.5233 | 3.2741  | 3.1514  | H                        | -5.5224 | 2.1111  | 3.0345  |
| C  | -1.5545 | 2.0191  | 1.7545  | H                        | -6.5673 | 1.4577  | 2.0369  |
| O  | -0.9572 | 1.9493  | 0.6364  | C                        | 0.0137  | 3.1215  | -4.6764 |
| O  | -1.9803 | 1.0345  | 2.3978  | C                        | -1.7249 | 3.3804  | 2.4107  |
| H  | 5.9734  | 0.8188  | -0.6069 | C                        | 5.5494  | 1.8102  | -0.7689 |
| H  | 6.1429  | 2.4870  | -0.1420 | N                        | -3.7517 | 0.9066  | -4.9160 |
| C  | 4.1667  | 1.7822  | -0.2137 | C                        | -5.7043 | 3.5684  | 6.5604  |
| N  | 3.5507  | 2.8652  | 0.3788  | N                        | -4.2434 | -1.3555 | 5.5896  |
| H  | 3.9999  | 3.7506  | 0.6224  | Cps                      | 1.2051  | 4.0926  | -4.5780 |
| C  | 2.2683  | 2.5400  | 0.6257  | Cps                      | -1.9618 | 4.5734  | 1.4908  |
| H  | 1.5620  | 3.1966  | 1.1091  | Cps                      | 5.6477  | 2.1871  | -2.2567 |
| N  | 2.0168  | 1.3073  | 0.2166  | Cps                      | -3.3088 | 0.2447  | -6.1021 |
| C  | 3.1950  | 0.8261  | -0.3007 | Cps                      | -5.5266 | 4.9060  | 7.2564  |
| H  | 3.2562  | -0.1706 | -0.7122 | Cps                      | -5.1455 | -0.6948 | 6.5205  |
| C  | -4.1644 | 2.2011  | -4.8112 |                          |         |         |         |
| H  | -4.2373 | 2.8453  | -5.6756 | TS <sub>I3'PGlu136</sub> |         |         |         |
| N  | -4.4556 | 2.5365  | -3.5790 | H                        | -0.9257 | 3.6104  | -4.4541 |
| C  | -4.2259 | 1.3998  | -2.8529 | H                        | -0.0731 | 2.6957  | -5.6660 |
| C  | -4.4350 | 1.1346  | -1.4791 | C                        | 0.0504  | 1.9416  | -3.7211 |
| N  | -4.7910 | 2.0543  | -0.6122 | N                        | 0.7206  | 0.7628  | -3.9860 |
| H  | -4.9037 | 3.0085  | -0.9312 | H                        | 1.2180  | 0.5513  | -4.8499 |
| H  | -4.9701 | 1.8999  | 0.3861  | C                        | 0.6434  | -0.0130 | -2.8806 |
| N  | -4.2772 | -0.1832 | -1.1412 | H                        | 1.1027  | -0.9855 | -2.7803 |
| C  | -4.8125 | -0.7055 | 0.1647  | N                        | -0.0401 | 0.5905  | -1.9268 |
| H  | -4.7701 | -1.7901 | 0.0625  | C                        | -0.4183 | 1.8028  | -2.4440 |
| H  | -5.8592 | -0.3928 | 0.1963  | H                        | -0.9731 | 2.5070  | -1.8413 |
| H  | -4.5671 | 0.4205  | 1.7294  | H                        | -0.8097 | 3.5646  | 3.0541  |
| C  | -3.7622 | -1.0957 | -2.0368 | H                        | -2.5359 | 3.3079  | 3.1687  |
| H  | -3.5820 | -2.0771 | -1.6151 | C                        | -1.4904 | 2.0295  | 1.8758  |
| N  | -3.4976 | -0.8819 | -3.2891 | O                        | -0.9600 | 1.9239  | 0.7284  |
| C  | -3.7951 | 0.3750  | -3.6692 | O                        | -1.7775 | 1.0813  | 2.6354  |
| Fe | 0.1633  | 0.2342  | 0.1575  | H                        | 5.9596  | 0.8123  | -0.6112 |
| O  | 1.0634  | -7.4871 | -0.0309 | H                        | 6.1166  | 2.4787  | -0.1354 |
| C  | 1.7377  | -6.4827 | 0.3326  | C                        | 4.1435  | 1.7678  | -0.2366 |
| O  | 2.9097  | -6.5360 | 0.7730  | N                        | 3.5183  | 2.8516  | 0.3447  |
| C  | 1.0104  | -5.1393 | 0.2636  | H                        | 3.9652  | 3.7356  | 0.5949  |
| H  | 0.2616  | -5.2002 | -0.5318 | C                        | 2.2316  | 2.5234  | 0.5717  |
| H  | 0.4671  | -5.0441 | 1.2110  | H                        | 1.5187  | 3.1747  | 1.0525  |
| C  | 1.8743  | -3.8962 | 0.0795  | N                        | 1.9857  | 1.2927  | 0.1565  |
| H  | 2.7246  | -3.9676 | 0.7670  | C                        | 3.1724  | 0.8112  | -0.3390 |
| H  | 2.2855  | -3.8218 | -0.9300 | H                        | 3.2401  | -0.1857 | -0.7493 |
| C  | 1.1016  | -2.6283 | 0.4093  | C                        | -4.1609 | 2.2121  | -4.8300 |
|    |         |         |         | H                        | -4.2130 | 2.8611  | -5.6921 |

|     |         |         |         |    |         |         |         |
|-----|---------|---------|---------|----|---------|---------|---------|
| N   | -4.4646 | 2.5421  | -3.5991 | H  | -0.9426 | 3.5182  | -4.3575 |
| C   | -4.2569 | 1.3966  | -2.8796 | H  | -0.0973 | 2.5844  | -5.5594 |
| C   | -4.4565 | 1.1281  | -1.5095 | C  | 0.0902  | 1.8957  | -3.5953 |
| N   | -4.8127 | 2.0583  | -0.6518 | N  | 0.7607  | 0.7175  | -3.8527 |
| H   | -4.9291 | 3.0034  | -0.9895 | H  | 1.2256  | 0.4875  | -4.7287 |
| H   | -4.9687 | 1.8882  | 0.3459  | C  | 0.7244  | -0.0339 | -2.7301 |
| N   | -4.2871 | -0.1833 | -1.1705 | H  | 1.1896  | -1.0022 | -2.6249 |
| C   | -4.6776 | -0.6716 | 0.2388  | N  | 0.0707  | 0.5878  | -1.7658 |
| H   | -4.5438 | -1.7594 | 0.1590  | C  | -0.3329 | 1.7860  | -2.2999 |
| H   | -5.7588 | -0.4650 | 0.2820  | H  | -0.8908 | 2.4940  | -1.7052 |
| H   | -4.6792 | 0.8403  | 1.8235  | H  | -0.6867 | 3.5654  | 2.9073  |
| C   | -3.8058 | -1.0977 | -2.0690 | H  | -2.4239 | 3.4476  | 3.2426  |
| H   | -3.6360 | -2.0829 | -1.6523 | C  | -1.7213 | 2.1331  | 1.7576  |
| N   | -3.5517 | -0.8905 | -3.3286 | O  | -0.8509 | 1.9121  | 0.8698  |
| C   | -3.8303 | 0.3724  | -3.6942 | O  | -2.6468 | 1.3462  | 2.0759  |
| Fe  | 0.1259  | 0.1980  | 0.2563  | H  | 6.0159  | 0.8303  | -0.5949 |
| O   | 1.0892  | -7.4923 | -0.0080 | H  | 6.1777  | 2.4980  | -0.1327 |
| C   | 1.7599  | -6.4963 | 0.3846  | C  | 4.2094  | 1.7765  | -0.1603 |
| O   | 2.9398  | -6.5546 | 0.8038  | N  | 3.5980  | 2.8593  | 0.4371  |
| C   | 1.0201  | -5.1605 | 0.3772  | H  | 4.0393  | 3.7566  | 0.6459  |
| H   | 0.2552  | -5.2103 | -0.4027 | C  | 2.3350  | 2.5103  | 0.7521  |
| H   | 0.4970  | -5.0947 | 1.3384  | H  | 1.6325  | 3.1650  | 1.2437  |
| C   | 1.8613  | -3.9032 | 0.1952  | N  | 2.0909  | 1.2637  | 0.3864  |
| H   | 2.7055  | -3.9445 | 0.8930  | C  | 3.2537  | 0.7996  | -0.1800 |
| H   | 2.2873  | -3.8337 | -0.8084 | H  | 3.3170  | -0.2016 | -0.5795 |
| C   | 1.0569  | -2.6446 | 0.4957  | C  | -4.3905 | 1.9430  | -4.7070 |
| O   | 1.1825  | -1.6426 | -0.2608 | H  | -4.7299 | 2.5768  | -5.5139 |
| O   | 0.3029  | -2.6735 | 1.5213  | N  | -4.5428 | 2.1924  | -3.4272 |
| O   | -3.9560 | -0.0913 | 1.2004  | C  | -3.9498 | 1.1190  | -2.7946 |
| O   | 0.8042  | -0.1921 | 2.3334  | C  | -3.7249 | 0.7981  | -1.4344 |
| H   | 0.5921  | -1.1514 | 2.3264  | N  | -4.1019 | 1.5723  | -0.4156 |
| H   | 1.7630  | -0.1486 | 2.3966  | H  | -4.5498 | 2.4570  | -0.5897 |
| O   | -1.6233 | -1.0175 | 0.3438  | H  | -3.7418 | 1.3711  | 0.5155  |
| H   | -1.2955 | -1.7673 | 0.8724  | N  | -3.0774 | -0.3560 | -1.1799 |
| H   | -2.3932 | -0.5847 | 0.8023  | C  | -6.5358 | -1.1610 | 3.5818  |
| H   | -5.2431 | 2.7512  | 7.0779  | H  | -7.2746 | -1.9700 | 3.4836  |
| H   | -6.7783 | 3.2725  | 6.4964  | H  | -6.3104 | -0.8262 | 4.5992  |
| C   | -5.1296 | 3.4674  | 5.1696  | H  | -5.6191 | 1.0734  | 2.1804  |
| O   | -5.8123 | 2.6201  | 4.4191  | C  | -2.6420 | -1.1133 | -2.1988 |
| O   | -4.1011 | 4.0127  | 4.8161  | H  | -2.1086 | -2.0144 | -1.9046 |
| H   | -4.1921 | -2.3953 | 5.6186  | N  | -2.7662 | -0.9004 | -3.4967 |
| C   | -3.5432 | -0.7526 | 4.6593  | C  | -3.4342 | 0.2355  | -3.7260 |
| N   | -3.5788 | 0.5726  | 4.5709  | Fe | 0.2059  | 0.2094  | 0.4043  |
| H   | -4.0968 | 1.0395  | 5.2932  | O  | 1.0519  | -7.4936 | -0.0137 |
| H   | -2.8908 | 1.0378  | 3.9535  | C  | 1.7233  | -6.4936 | 0.3657  |
| N   | -2.7543 | -1.4351 | 3.8329  | O  | 2.8917  | -6.5507 | 0.8155  |
| H   | -2.7311 | -2.4467 | 3.8714  | C  | 0.9958  | -5.1497 | 0.3102  |
| H   | -2.3020 | -0.9139 | 3.0893  | H  | 0.2500  | -5.1990 | -0.4890 |
| O   | -5.3938 | 1.6493  | 2.0821  | H  | 0.4520  | -5.0690 | 1.2586  |
| H   | -5.4037 | 2.3490  | 3.5345  | C  | 1.8627  | -3.9046 | 0.1513  |
| H   | -6.2672 | 1.2387  | 2.0528  | H  | 2.7345  | -4.0165 | 0.8056  |
| C   | 0.0224  | 3.0993  | -4.6540 | H  | 2.2372  | -3.7860 | -0.8684 |
| C   | -1.7210 | 3.4183  | 2.4483  | C  | 1.1144  | -2.6506 | 0.5743  |
| C   | 5.5334  | 1.8028  | -0.7729 | O  | 1.1947  | -1.6085 | -0.1409 |
| N   | -3.7642 | 0.9143  | -4.9324 | O  | 0.4338  | -2.7210 | 1.6418  |
| C   | -5.7340 | 3.5879  | 6.5500  | O  | -6.0050 | -0.6840 | 2.6031  |
| N   | -4.2804 | -1.3806 | 5.5645  | O  | 0.5943  | -0.2126 | 2.5445  |
| Cps | 1.2053  | 4.0858  | -4.5741 | H  | 0.5119  | -1.1897 | 2.4648  |
| Cps | -1.9655 | 4.5773  | 1.4902  | H  | 1.4974  | -0.0422 | 2.8271  |
| Cps | 5.6476  | 2.1874  | -2.2572 | O  | -1.5477 | -0.9922 | 0.9820  |
| Cps | -3.3088 | 0.2440  | -6.1022 | H  | -1.2187 | -1.9038 | 1.0161  |
| Cps | -5.5268 | 4.9066  | 7.2558  | H  | -2.2744 | -0.8730 | 0.3213  |
| Cps | -5.1453 | -0.6943 | 6.5204  | H  | -5.1221 | 2.9003  | 7.2444  |
|     |         |         |         | H  | -6.7388 | 3.3219  | 6.8178  |
|     |         |         |         | C  | -5.2680 | 3.5972  | 5.3194  |
|     |         |         |         | O  | -5.9232 | 2.6204  | 4.6895  |
|     |         |         |         | O  | -4.3973 | 4.2648  | 4.8035  |
|     |         |         |         | H  | -3.9996 | -2.3601 | 5.5686  |
|     |         |         |         | C  | -3.5209 | -0.6884 | 4.5333  |
|     |         |         |         | N  | -3.6941 | 0.6220  | 4.4178  |

|     |         |         |         |     |         |         |         |
|-----|---------|---------|---------|-----|---------|---------|---------|
| H   | -4.4115 | 1.0311  | 4.9944  | N   | -3.5168 | -1.0213 | -3.3915 |
| H   | -3.3232 | 1.1053  | 3.5803  | C   | -3.8775 | 0.2438  | -3.6633 |
| N   | -2.7134 | -1.3438 | 3.7062  | Fe  | -0.0086 | 0.1753  | 0.2518  |
| H   | -2.6450 | -2.3516 | 3.7920  | O   | 0.9694  | -7.3359 | -0.1008 |
| H   | -2.3416 | -0.8966 | 2.8633  | C   | 1.6884  | -6.3708 | 0.2812  |
| O   | -5.9867 | 1.9756  | 2.1701  | O   | 2.8793  | -6.4927 | 0.6715  |
| H   | -5.7758 | 2.5357  | 3.7027  | C   | 1.0147  | -5.0051 | 0.3246  |
| H   | -6.8952 | 1.8411  | 1.8613  | H   | 0.1656  | -5.0004 | -0.3615 |
| C   | 0.0120  | 3.0228  | -4.5632 | H   | 0.5960  | -4.9163 | 1.3335  |
| C   | -1.6797 | 3.4927  | 2.4418  | C   | 1.8837  | -3.7771 | 0.0645  |
| C   | 5.5784  | 1.8163  | -0.7492 | H   | 2.8167  | -3.8863 | 0.6284  |
| N   | -3.7269 | 0.7773  | -4.9363 | H   | 2.1535  | -3.6762 | -0.9900 |
| C   | -5.7128 | 3.6962  | 6.7588  | C   | 1.1741  | -2.5111 | 0.5415  |
| N   | -4.1647 | -1.3555 | 5.4931  | O   | 1.2401  | -1.4635 | -0.1853 |
| Cps | 1.1735  | 4.0396  | -4.5401 | O   | 0.5574  | -2.5791 | 1.6300  |
| Cps | -1.9545 | 4.6635  | 1.4921  | O   | -1.4372 | -0.7881 | -0.5130 |
| Cps | 5.6527  | 2.1932  | -2.2376 | O   | -0.2104 | -0.0384 | 2.0528  |
| Cps | -3.2941 | 0.2208  | -6.1788 | H   | -1.3716 | -3.4066 | 0.9333  |
| Cps | -5.5120 | 5.0425  | 7.4128  | H   | 0.0952  | -0.9438 | 2.2415  |
| Cps | -5.0736 | -0.7199 | 6.4501  | O   | -1.8918 | -3.3991 | 0.1190  |
|     |         |         |         | H   | -1.6002 | -2.5513 | -0.2776 |
|     |         |         |         | C   | 0.2085  | 3.2534  | -4.6913 |
|     |         |         |         | C   | -1.6981 | 3.4725  | 2.2245  |
|     |         |         |         | C   | 5.4613  | 1.8315  | -0.7885 |
|     |         |         |         | N   | -3.8570 | 0.8546  | -4.8725 |
|     |         |         |         | Cps | 1.3957  | 4.2303  | -4.5647 |
|     |         |         |         | Cps | -1.9473 | 4.7757  | 1.4569  |
|     |         |         |         | Cps | 5.6920  | 2.2051  | -2.2681 |
|     |         |         |         | Cps | -3.3634 | 0.2678  | -6.0793 |

The OH<sup>-</sup> pathway

R<sup>OH</sup> (<sup>55</sup>Fe<sup>III</sup>-O<sub>AF</sub>)

|   |         |         |         |
|---|---------|---------|---------|
| H | -0.7389 | 3.7674  | -4.4960 |
| H | 0.1286  | 2.8740  | -5.7140 |
| C | 0.2195  | 2.0791  | -3.7834 |
| N | 0.8470  | 0.8856  | -4.0796 |
| H | 1.3190  | 0.6714  | -4.9568 |
| C | 0.7834  | 0.1033  | -2.9776 |
| H | 1.2123  | -0.8845 | -2.8993 |
| N | 0.1503  | 0.7203  | -2.0032 |
| C | -0.2132 | 1.9440  | -2.4946 |
| H | -0.7331 | 2.6532  | -1.8681 |
| H | -0.7020 | 3.4499  | 2.6848  |
| H | -2.4142 | 3.3312  | 3.0389  |
| C | -1.7915 | 2.2070  | 1.3822  |
| O | -0.9265 | 2.0597  | 0.4660  |
| O | -2.7211 | 1.4113  | 1.6456  |
| H | 5.8522  | 0.8308  | -0.6018 |
| H | 6.0270  | 2.4949  | -0.1228 |
| C | 4.0498  | 1.8207  | -0.2979 |
| N | 3.4334  | 2.8980  | 0.3097  |
| H | 3.8849  | 3.7795  | 0.5557  |
| C | 2.1584  | 2.5526  | 0.5860  |
| H | 1.4526  | 3.2047  | 1.0756  |
| N | 1.9097  | 1.3189  | 0.1840  |
| C | 3.0841  | 0.8545  | -0.3586 |
| H | 3.1476  | -0.1465 | -0.7562 |
| C | -4.3015 | 2.1291  | -4.6839 |
| H | -4.3901 | 2.8260  | -5.5053 |
| N | -4.5888 | 2.3823  | -3.4294 |
| C | -4.3236 | 1.2033  | -2.7759 |
| C | -4.3564 | 0.8628  | -1.4012 |
| N | -4.6101 | 1.6866  | -0.4075 |
| H | -4.9127 | 2.6466  | -0.5635 |
| H | -4.2274 | 1.4955  | 0.5210  |
| N | -4.0874 | -0.4563 | -1.1551 |
| C | -4.1708 | -0.9608 | 0.2216  |
| H | -3.8482 | -2.0008 | 0.2377  |
| H | -5.2028 | -0.8601 | 0.5652  |
| H | -3.4838 | -0.3817 | 0.8371  |
| C | -3.6437 | -1.3074 | -2.1296 |
| H | -3.3941 | -2.3001 | -1.7754 |

R<sup>OH</sup> (<sup>56</sup>Fe<sup>III</sup>-O<sub>F</sub>)

|   |         |         |         |
|---|---------|---------|---------|
| H | -0.7382 | 3.7633  | -4.5032 |
| H | 0.1364  | 2.8553  | -5.7053 |
| C | 0.2169  | 2.0846  | -3.7635 |
| N | 0.8284  | 0.8789  | -4.0466 |
| H | 1.2965  | 0.6500  | -4.9221 |
| C | 0.7643  | 0.1098  | -2.9372 |
| H | 1.1837  | -0.8801 | -2.8368 |
| N | 0.1446  | 0.7532  | -1.9689 |
| C | -0.2091 | 1.9763  | -2.4707 |
| H | -0.7136 | 2.6963  | -1.8448 |
| H | -0.7045 | 3.4453  | 2.6807  |
| H | -2.4162 | 3.3215  | 3.0291  |
| C | -1.7863 | 2.2150  | 1.3582  |
| O | -0.9807 | 2.1243  | 0.3890  |
| O | -2.6690 | 1.3791  | 1.6724  |
| H | 5.8347  | 0.8357  | -0.5952 |
| H | 6.0005  | 2.5015  | -0.1167 |
| C | 4.0247  | 1.8229  | -0.3169 |
| N | 3.4018  | 2.8877  | 0.3063  |
| H | 3.8511  | 3.7630  | 0.5761  |
| C | 2.1177  | 2.5443  | 0.5456  |
| H | 1.4054  | 3.1847  | 1.0410  |
| N | 1.8713  | 1.3248  | 0.1024  |
| C | 3.0543  | 0.8654  | -0.4249 |
| H | 3.1215  | -0.1282 | -0.8402 |
| C | -4.3472 | 2.1057  | -4.6785 |
| H | -4.4957 | 2.7874  | -5.5040 |
| N | -4.6084 | 2.3623  | -3.4188 |
| C | -4.2660 | 1.2066  | -2.7582 |
| C | -4.2675 | 0.8714  | -1.3813 |
| N | -4.5557 | 1.6775  | -0.3831 |
| H | -4.8943 | 2.6266  | -0.5340 |
| H | -4.1500 | 1.4918  | 0.5399  |
| N | -3.9387 | -0.4370 | -1.1342 |
| C | -4.0976 | -0.9672 | 0.2297  |

|     |         |         |         |     |         |         |         |
|-----|---------|---------|---------|-----|---------|---------|---------|
| H   | -3.7908 | -2.0119 | 0.2406  | N   | -4.5718 | 1.6779  | -0.3936 |
| H   | -5.1472 | -0.8602 | 0.5123  | H   | -4.8885 | 2.6340  | -0.5471 |
| H   | -3.4324 | -0.4096 | 0.8844  | H   | -4.1561 | 1.4940  | 0.5269  |
| C   | -3.4492 | -1.2653 | -2.1057 | N   | -4.0286 | -0.4566 | -1.1491 |
| H   | -3.1352 | -2.2397 | -1.7488 | C   | -4.1025 | -0.9645 | 0.2279  |
| N   | -3.3467 | -0.9762 | -3.3703 | H   | -3.7772 | -2.0037 | 0.2413  |
| C   | -3.7918 | 0.2609  | -3.6467 | H   | -5.1328 | -0.8663 | 0.5768  |
| Fe  | 0.0025  | 0.1946  | 0.0869  | H   | -3.4144 | -0.3811 | 0.8387  |
| O   | 0.9650  | -7.3366 | -0.1002 | C   | -3.5819 | -1.3010 | -2.1267 |
| C   | 1.6902  | -6.3774 | 0.2848  | H   | -3.3107 | -2.2892 | -1.7744 |
| O   | 2.8801  | -6.5068 | 0.6756  | N   | -3.4681 | -1.0132 | -3.3898 |
| C   | 1.0365  | -5.0033 | 0.3295  | C   | -3.8547 | 0.2450  | -3.6591 |
| H   | 0.1637  | -4.9956 | -0.3259 | Fe  | 0.0364  | 0.2739  | 0.0169  |
| H   | 0.6610  | -4.8868 | 1.3526  | O   | 0.9634  | -7.3473 | -0.0999 |
| C   | 1.9217  | -3.8015 | 0.0103  | C   | 1.6900  | -6.3883 | 0.2830  |
| H   | 2.8591  | -3.9055 | 0.5668  | O   | 2.8783  | -6.5188 | 0.6795  |
| H   | 2.1782  | -3.7514 | -1.0513 | C   | 1.0479  | -5.0109 | 0.3139  |
| C   | 1.2366  | -2.5037 | 0.4384  | H   | 0.1682  | -5.0043 | -0.3320 |
| O   | 1.2929  | -1.5037 | -0.3487 | H   | 0.6846  | -4.8726 | 1.3386  |
| O   | 0.6495  | -2.5178 | 1.5486  | C   | 1.9468  | -3.8288 | -0.0342 |
| O   | -1.2930 | -0.7341 | -0.2142 | H   | 2.8890  | -3.9415 | 0.5127  |
| O   | 0.0507  | 0.0468  | 1.8628  | H   | 2.1912  | -3.8001 | -1.0997 |
| H   | -1.3305 | -3.5121 | 1.0031  | C   | 1.2907  | -2.5124 | 0.3809  |
| H   | 0.1447  | -0.9176 | 2.0096  | O   | 1.3395  | -1.5289 | -0.4163 |
| O   | -1.8509 | -3.3741 | 0.2018  | O   | 0.7248  | -2.5033 | 1.5070  |
| H   | -1.5517 | -2.4735 | -0.0401 | O   | -1.3565 | -0.7145 | -0.5038 |
| C   | 0.2106  | 3.2484  | -4.6872 | O   | -0.0843 | 0.0098  | 1.7622  |
| C   | -1.6996 | 3.4709  | 2.2166  | H   | -1.2357 | -3.3754 | 0.9339  |
| C   | 5.4446  | 1.8355  | -0.7878 | H   | 0.2194  | -0.9129 | 1.8914  |
| N   | -3.8439 | 0.8529  | -4.8649 | O   | -1.8041 | -3.3427 | 0.1526  |
| Cps | 1.3952  | 4.2291  | -4.5643 | H   | -1.5062 | -2.5014 | -0.2454 |
| Cps | -1.9471 | 4.7769  | 1.4563  | C   | 0.2155  | 3.2392  | -4.6846 |
| Cps | 5.6907  | 2.2052  | -2.2671 | C   | -1.7067 | 3.4706  | 2.2197  |
| Cps | -3.3624 | 0.2681  | -6.0781 | C   | 5.4526  | 1.8367  | -0.7858 |
|     |         |         |         | N   | -3.8555 | 0.8528  | -4.8702 |
|     |         |         |         | Cps | 1.3949  | 4.2277  | -4.5643 |
|     |         |         |         | Cps | -1.9478 | 4.7775  | 1.4572  |
|     |         |         |         | Cps | 5.6912  | 2.2053  | -2.2667 |
|     |         |         |         | Cps | -3.3636 | 0.2679  | -6.0790 |

$R^{OH}(^{15}Fe^{III}-O_{AF})$

|   |         |         |         |
|---|---------|---------|---------|
| H | -0.7361 | 3.7474  | -4.4967 |
| H | 0.1409  | 2.8458  | -5.7026 |
| C | 0.2334  | 2.0751  | -3.7599 |
| N | 0.8599  | 0.8742  | -4.0391 |
| H | 1.3249  | 0.6465  | -4.9168 |
| C | 0.8135  | 0.1089  | -2.9280 |
| H | 1.2464  | -0.8742 | -2.8150 |
| N | 0.1889  | 0.7523  | -1.9610 |
| C | -0.1871 | 1.9683  | -2.4665 |
| H | -0.7030 | 2.6807  | -1.8410 |
| H | -0.7092 | 3.4368  | 2.6779  |
| H | -2.4202 | 3.3268  | 3.0363  |
| C | -1.8107 | 2.2258  | 1.3491  |
| O | -1.0254 | 2.1482  | 0.3671  |
| O | -2.7002 | 1.3914  | 1.6591  |
| H | 5.8414  | 0.8363  | -0.5946 |
| H | 6.0139  | 2.5022  | -0.1187 |
| C | 4.0360  | 1.8273  | -0.3062 |
| N | 3.4141  | 2.8991  | 0.3068  |
| H | 3.8649  | 3.7766  | 0.5683  |
| C | 2.1317  | 2.5595  | 0.5545  |
| H | 1.4187  | 3.2057  | 1.0414  |
| N | 1.8861  | 1.3335  | 0.1270  |
| C | 3.0679  | 0.8668  | -0.3989 |
| H | 3.1305  | -0.1325 | -0.8016 |
| C | -4.3177 | 2.1207  | -4.6801 |
| H | -4.4256 | 2.8147  | -5.5017 |
| N | -4.5958 | 2.3726  | -3.4231 |
| C | -4.3078 | 1.1989  | -2.7689 |
| C | -4.3196 | 0.8608  | -1.3920 |

$R^{OH}(^{15}Fe^{III}-O_F)$

|   |         |         |         |
|---|---------|---------|---------|
| H | -0.7305 | 3.7392  | -4.4745 |
| H | 0.1433  | 2.8207  | -5.6695 |
| C | 0.2488  | 2.0806  | -3.7154 |
| N | 0.8465  | 0.8677  | -3.9965 |
| H | 1.3009  | 0.6291  | -4.8758 |
| C | 0.7980  | 0.1126  | -2.8736 |
| H | 1.2023  | -0.8835 | -2.7785 |
| N | 0.2041  | 0.7683  | -1.8998 |
| C | -0.1508 | 1.9859  | -2.4119 |
| H | -0.6422 | 2.7175  | -1.7894 |
| H | -0.6709 | 3.4456  | 2.6625  |
| H | -2.3805 | 3.3012  | 3.0251  |
| C | -1.7525 | 2.1712  | 1.3819  |
| O | -0.8693 | 2.0109  | 0.4786  |
| O | -2.6885 | 1.3918  | 1.6522  |
| H | 5.8599  | 0.8215  | -0.6197 |
| H | 6.0301  | 2.4831  | -0.1296 |
| C | 4.0531  | 1.8066  | -0.3063 |
| N | 3.4450  | 2.8769  | 0.3212  |
| H | 3.8993  | 3.7549  | 0.5724  |
| C | 2.1675  | 2.5313  | 0.5985  |
| H | 1.4692  | 3.1790  | 1.1045  |
| N | 1.9082  | 1.3081  | 0.1785  |
| C | 3.0775  | 0.8478  | -0.3758 |
| H | 3.1349  | -0.1459 | -0.7937 |
| C | -4.3246 | 2.1263  | -4.6910 |



|     |         |         |         |     |         |         |         |
|-----|---------|---------|---------|-----|---------|---------|---------|
| H   | -4.4399 | 2.8121  | -5.5184 | H   | 3.1373  | -0.1139 | -0.7442 |
| N   | -4.5994 | 2.3888  | -3.4356 | C   | -4.3576 | 2.1163  | -4.6953 |
| C   | -4.3005 | 1.2235  | -2.7716 | H   | -4.4484 | 2.8187  | -5.5120 |
| C   | -4.3239 | 0.8920  | -1.3951 | N   | -4.6522 | 2.3562  | -3.4390 |
| N   | -4.5922 | 1.7136  | -0.4028 | C   | -4.3804 | 1.1745  | -2.7927 |
| H   | -4.9028 | 2.6709  | -0.5584 | C   | -4.3378 | 0.8469  | -1.4144 |
| H   | -4.2084 | 1.5192  | 0.5243  | N   | -4.5328 | 1.6852  | -0.4224 |
| N   | -4.0391 | -0.4231 | -1.1410 | H   | -4.8837 | 2.6274  | -0.5862 |
| C   | -4.1992 | -0.9354 | 0.2286  | H   | -4.0523 | 1.5367  | 0.4781  |
| H   | -3.9094 | -1.9842 | 0.2414  | N   | -4.0154 | -0.4689 | -1.1769 |
| H   | -5.2444 | -0.8078 | 0.5186  | C   | -3.7648 | -0.9460 | 0.1640  |
| H   | -3.5153 | -0.3882 | 0.8740  | H   | -3.8636 | -2.0267 | 0.2187  |
| C   | -3.5654 | -1.2691 | -2.1055 | H   | -4.3439 | -0.4156 | 0.9113  |
| H   | -3.2801 | -2.2499 | -1.7403 | H   | -2.5387 | -0.7333 | 0.2667  |
| N   | -3.4409 | -0.9861 | -3.3699 | C   | -3.6046 | -1.3204 | -2.1778 |
| C   | -3.8415 | 0.2640  | -3.6533 | H   | -3.3093 | -2.3033 | -1.8301 |
| Fe  | -0.0717 | 0.2266  | 0.1328  | N   | -3.5389 | -1.0338 | -3.4380 |
| O   | 0.9702  | -7.2690 | -0.1092 | C   | -3.9246 | 0.2293  | -3.6874 |
| C   | 1.6792  | -6.2923 | 0.2664  | Fe  | -0.0171 | 0.2102  | 0.2487  |
| O   | 2.8695  | -6.4042 | 0.6582  | O   | 0.9710  | -7.2887 | -0.0946 |
| C   | 0.9767  | -4.9314 | 0.3026  | C   | 1.6955  | -6.3361 | 0.3078  |
| H   | 0.1352  | -4.9512 | -0.3928 | O   | 2.8886  | -6.4774 | 0.6847  |
| H   | 0.5471  | -4.8568 | 1.3086  | C   | 1.0313  | -4.9639 | 0.3937  |
| C   | 1.8017  | -3.6653 | 0.0506  | H   | 0.1600  | -4.9476 | -0.2618 |
| H   | 2.7398  | -3.7436 | 0.6115  | H   | 0.6478  | -4.8796 | 1.4174  |
| H   | 2.0606  | -3.5472 | -1.0048 | C   | 1.8873  | -3.7273 | 0.1133  |
| C   | 1.0492  | -2.4271 | 0.5516  | H   | 2.8192  | -3.8101 | 0.6828  |
| O   | 1.0335  | -1.3869 | -0.2019 | H   | 2.1589  | -3.6411 | -0.9419 |
| O   | 0.4970  | -2.5121 | 1.6665  | C   | 1.1568  | -2.4620 | 0.5684  |
| O   | -1.4261 | -0.5453 | -0.2789 | O   | 1.1847  | -1.4327 | -0.1942 |
| O   | -0.0731 | 0.0890  | 1.9152  | O   | 0.5647  | -2.5067 | 1.6679  |
| H   | -1.4728 | -3.3583 | 0.8621  | O   | -1.4805 | -0.7895 | -0.3879 |
| H   | 0.1866  | -0.8265 | 2.1051  | O   | -0.1668 | 0.0757  | 2.0722  |
| O   | -1.8968 | -3.2083 | 0.0085  | H   | -1.3853 | -3.4864 | 0.8827  |
| H   | -1.6322 | -2.2771 | -0.1635 | H   | 0.1448  | -0.8219 | 2.2804  |
| C   | 0.2223  | 3.2311  | -4.6581 | O   | -1.8195 | -3.4584 | 0.0212  |
| C   | -1.6698 | 3.4543  | 2.2084  | H   | -1.5441 | -2.5679 | -0.2864 |
| C   | 5.4662  | 1.8223  | -0.7994 | C   | 0.2063  | 3.2363  | -4.7101 |
| N   | -3.8543 | 0.8599  | -4.8710 | C   | -1.6715 | 3.4782  | 2.2145  |
| Cps | 1.3969  | 4.2289  | -4.5602 | C   | 5.4591  | 1.8420  | -0.8021 |
| Cps | -1.9446 | 4.7625  | 1.4547  | N   | -3.8999 | 0.8473  | -4.8865 |
| Cps | 5.6984  | 2.2060  | -2.2781 | Cps | 1.3855  | 4.2212  | -4.5761 |
| Cps | -3.3665 | 0.2684  | -6.0784 | Cps | -1.9420 | 4.7795  | 1.4508  |
|     |         |         |         | Cps | 5.6876  | 2.2016  | -2.2853 |
|     |         |         |         | Cps | -3.3739 | 0.2619  | -6.0751 |

TS<sub>R11</sub><sup>OH</sup> (<sup>HS</sup>Fe<sup>III</sup>-O<sub>AF</sub>)

|   |         |         |         |
|---|---------|---------|---------|
| H | -0.7466 | 3.7452  | -4.5291 |
| H | 0.1412  | 2.8507  | -5.7317 |
| C | 0.2196  | 2.0689  | -3.7942 |
| N | 0.8669  | 0.8822  | -4.0717 |
| H | 1.3448  | 0.6642  | -4.9449 |
| C | 0.8131  | 0.1151  | -2.9576 |
| H | 1.2585  | -0.8639 | -2.8655 |
| N | 0.1671  | 0.7349  | -1.9932 |
| C | -0.2142 | 1.9452  | -2.5046 |
| H | -0.7456 | 2.6578  | -1.8923 |
| H | -0.6627 | 3.4515  | 2.6444  |
| H | -2.3674 | 3.3357  | 3.0458  |
| C | -1.8000 | 2.2285  | 1.3588  |
| O | -0.9638 | 2.0843  | 0.4162  |
| O | -2.7426 | 1.4456  | 1.6199  |
| H | 5.8384  | 0.8388  | -0.6067 |
| H | 6.0346  | 2.5054  | -0.1443 |
| C | 4.0484  | 1.8528  | -0.3107 |
| N | 3.4345  | 2.9456  | 0.2710  |
| H | 3.8909  | 3.8267  | 0.5111  |
| C | 2.1553  | 2.6125  | 0.5452  |
| H | 1.4515  | 3.2794  | 1.0174  |
| N | 1.9024  | 1.3732  | 0.1658  |
| C | 3.0767  | 0.8927  | -0.3605 |

TS<sub>R11</sub><sup>OH</sup> (<sup>IS</sup>Fe<sup>III</sup>-O<sub>F</sub>)

|   |         |         |         |
|---|---------|---------|---------|
| H | -0.7531 | 3.7542  | -4.5636 |
| H | 0.1548  | 2.8519  | -5.7448 |
| C | 0.1831  | 2.0751  | -3.8042 |
| N | 0.8377  | 0.8840  | -4.0507 |
| H | 1.3333  | 0.6542  | -4.9112 |
| C | 0.7497  | 0.1233  | -2.9379 |
| H | 1.1969  | -0.8506 | -2.8042 |
| N | 0.0720  | 0.7582  | -2.0014 |
| C | -0.2951 | 1.9667  | -2.5314 |
| H | -0.8423 | 2.6829  | -1.9381 |
| H | -0.6611 | 3.4280  | 2.6157  |
| H | -2.3560 | 3.3221  | 3.0503  |
| C | -1.8299 | 2.2453  | 1.3224  |
| O | -1.1089 | 2.1856  | 0.2889  |
| O | -2.7013 | 1.4035  | 1.6579  |
| H | 5.7412  | 0.8782  | -0.5623 |
| H | 5.9311  | 2.5518  | -0.1191 |
| C | 3.9471  | 1.9094  | -0.3601 |
| N | 3.3241  | 2.9923  | 0.2343  |
| H | 3.7801  | 3.8648  | 0.5050  |
| C | 2.0322  | 2.6707  | 0.4555  |

|     |         |         |         |    |         |         |         |
|-----|---------|---------|---------|----|---------|---------|---------|
| H   | 1.3197  | 3.3271  | 0.9288  | C  | 4.0282  | 1.9414  | -0.3118 |
| N   | 1.7809  | 1.4456  | 0.0287  | N  | 3.4063  | 3.0387  | 0.2533  |
| C   | 2.9677  | 0.9624  | -0.4694 | H  | 3.8598  | 3.9211  | 0.4956  |
| H   | 3.0299  | -0.0420 | -0.8579 | C  | 2.1191  | 2.7130  | 0.5004  |
| C   | -4.3650 | 2.1209  | -4.7039 | H  | 1.4085  | 3.3839  | 0.9566  |
| H   | -4.4893 | 2.8106  | -5.5271 | N  | 1.8713  | 1.4729  | 0.1198  |
| N   | -4.6407 | 2.3722  | -3.4452 | C  | 3.0551  | 0.9858  | -0.3779 |
| C   | -4.3269 | 1.2080  | -2.7855 | H  | 3.1218  | -0.0246 | -0.7487 |
| C   | -4.2694 | 0.8947  | -1.4049 | C  | -4.3491 | 2.1423  | -4.7222 |
| N   | -4.4864 | 1.7232  | -0.4089 | H  | -4.4395 | 2.8419  | -5.5417 |
| H   | -4.8580 | 2.6602  | -0.5591 | N  | -4.6422 | 2.3853  | -3.4655 |
| H   | -4.0170 | 1.5591  | 0.4950  | C  | -4.3700 | 1.2061  | -2.8140 |
| N   | -3.9094 | -0.4121 | -1.1541 | C  | -4.3093 | 0.8822  | -1.4350 |
| C   | -3.7078 | -0.8772 | 0.1881  | N  | -4.4986 | 1.7186  | -0.4435 |
| H   | -3.7330 | -1.9624 | 0.2432  | H  | -4.8531 | 2.6606  | -0.6042 |
| H   | -4.3324 | -0.3694 | 0.9123  | H  | -4.0134 | 1.5652  | 0.4579  |
| H   | -2.3357 | -0.6523 | 0.2984  | N  | -3.9708 | -0.4326 | -1.1982 |
| C   | -3.4930 | -1.2642 | -2.1510 | C  | -3.6726 | -0.9006 | 0.1333  |
| H   | -3.1796 | -2.2392 | -1.7963 | H  | -3.7427 | -1.9833 | 0.1912  |
| N   | -3.4408 | -0.9861 | -3.4159 | H  | -4.2316 | -0.3769 | 0.8986  |
| C   | -3.8630 | 0.2616  | -3.6763 | H  | -2.4265 | -0.6599 | 0.1787  |
| Fe  | 0.0147  | 0.3181  | 0.0658  | C  | -3.5755 | -1.2865 | -2.2024 |
| O   | 0.9763  | -7.2690 | -0.0964 | H  | -3.2728 | -2.2680 | -1.8576 |
| C   | 1.7067  | -6.3241 | 0.3138  | N  | -3.5281 | -1.0033 | -3.4631 |
| O   | 2.8999  | -6.4761 | 0.6881  | C  | -3.9174 | 0.2596  | -3.7062 |
| C   | 1.0649  | -4.9426 | 0.4087  | Fe | 0.0146  | 0.3346  | 0.0358  |
| H   | 0.1642  | -4.9216 | -0.2059 | O  | 1.2100  | -7.1545 | -0.0469 |
| H   | 0.7341  | -4.8266 | 1.4477  | C  | 1.9592  | -6.2211 | 0.3559  |
| C   | 1.9418  | -3.7398 | 0.0601  | O  | 3.1764  | -6.3776 | 0.6378  |
| H   | 2.8754  | -3.8183 | 0.6264  | C  | 1.3050  | -4.8557 | 0.5597  |
| H   | 2.2065  | -3.7168 | -1.0004 | H  | 0.3860  | -4.8254 | -0.0252 |
| C   | 1.2502  | -2.4282 | 0.4418  | H  | 0.9989  | -4.8076 | 1.6119  |
| O   | 1.2827  | -1.4652 | -0.3880 | C  | 2.1320  | -3.6006 | 0.2578  |
| O   | 0.6849  | -2.3950 | 1.5649  | H  | 3.0161  | -3.5978 | 0.9054  |
| O   | -1.3142 | -0.7936 | -0.1766 | H  | 2.4868  | -3.5692 | -0.7753 |
| O   | 0.0908  | 0.1839  | 1.8234  | C  | 1.3137  | -2.3441 | 0.5728  |
| H   | -1.3984 | -3.5444 | 0.9968  | O  | 1.3002  | -1.3892 | -0.2681 |
| H   | 0.2207  | -0.7807 | 1.9658  | O  | 0.6890  | -2.3442 | 1.6625  |
| O   | -1.8237 | -3.4454 | 0.1369  | O  | -1.4051 | -0.6769 | -0.5057 |
| H   | -1.4663 | -2.5740 | -0.1309 | O  | -0.1196 | 0.1813  | 1.7904  |
| C   | 0.2003  | 3.2398  | -4.7231 | H  | -1.2036 | -3.3465 | 0.7864  |
| C   | -1.6786 | 3.4707  | 2.2048  | H  | 0.2193  | -0.7140 | 1.9888  |
| C   | 5.3829  | 1.8815  | -0.7922 | O  | -1.6257 | -3.3696 | -0.0819 |
| N   | -3.8801 | 0.8612  | -4.8869 | H  | -1.3795 | -2.4820 | -0.4163 |
| Cps | 1.3829  | 4.2176  | -4.5675 | C  | 0.2128  | 3.2181  | -4.7041 |
| Cps | -1.9499 | 4.7766  | 1.4553  | C  | -1.6856 | 3.4550  | 2.2036  |
| Cps | 5.6875  | 2.2107  | -2.2730 | C  | 5.4471  | 1.9052  | -0.7824 |
| Cps | -3.3666 | 0.2666  | -6.0780 | N  | -3.8936 | 0.8716  | -4.9055 |

TS<sub>R11</sub><sup>OH</sup> (<sup>15</sup>Fe<sup>III</sup>-O<sub>AF</sub>)

|   |         |         |         |
|---|---------|---------|---------|
| H | -0.7466 | 3.7180  | -4.5347 |
| H | 0.1616  | 2.8270  | -5.7247 |
| C | 0.2346  | 2.0583  | -3.7797 |
| N | 0.9082  | 0.8792  | -4.0325 |
| H | 1.3852  | 0.6519  | -4.9041 |
| C | 0.8853  | 0.1371  | -2.9039 |
| H | 1.3536  | -0.8273 | -2.7785 |
| N | 0.2312  | 0.7730  | -1.9532 |
| C | -0.1887 | 1.9612  | -2.4875 |
| H | -0.7352 | 2.6709  | -1.8864 |
| H | -0.6731 | 3.4073  | 2.6238  |
| H | -2.3756 | 3.3090  | 3.0392  |
| C | -1.8407 | 2.2376  | 1.3124  |
| O | -1.0860 | 2.1594  | 0.3056  |
| O | -2.7596 | 1.4310  | 1.6102  |
| H | 5.8154  | 0.9078  | -0.5470 |
| H | 6.0189  | 2.5874  | -0.1407 |

|     |         |         |         |
|-----|---------|---------|---------|
| C   | 4.0282  | 1.9414  | -0.3118 |
| N   | 3.4063  | 3.0387  | 0.2533  |
| H   | 3.8598  | 3.9211  | 0.4956  |
| C   | 2.1191  | 2.7130  | 0.5004  |
| H   | 1.4085  | 3.3839  | 0.9566  |
| N   | 1.8713  | 1.4729  | 0.1198  |
| C   | 3.0551  | 0.9858  | -0.3779 |
| H   | 3.1218  | -0.0246 | -0.7487 |
| C   | -4.3491 | 2.1423  | -4.7222 |
| H   | -4.4395 | 2.8419  | -5.5417 |
| N   | -4.6422 | 2.3853  | -3.4655 |
| C   | -4.3700 | 1.2061  | -2.8140 |
| C   | -4.3093 | 0.8822  | -1.4350 |
| N   | -4.4986 | 1.7186  | -0.4435 |
| H   | -4.8531 | 2.6606  | -0.6042 |
| H   | -4.0134 | 1.5652  | 0.4579  |
| N   | -3.9708 | -0.4326 | -1.1982 |
| C   | -3.6726 | -0.9006 | 0.1333  |
| H   | -3.7427 | -1.9833 | 0.1912  |
| H   | -4.2316 | -0.3769 | 0.8986  |
| H   | -2.4265 | -0.6599 | 0.1787  |
| C   | -3.5755 | -1.2865 | -2.2024 |
| H   | -3.2728 | -2.2680 | -1.8576 |
| N   | -3.5281 | -1.0033 | -3.4631 |
| C   | -3.9174 | 0.2596  | -3.7062 |
| Fe  | 0.0146  | 0.3346  | 0.0358  |
| O   | 1.2100  | -7.1545 | -0.0469 |
| C   | 1.9592  | -6.2211 | 0.3559  |
| O   | 3.1764  | -6.3776 | 0.6378  |
| C   | 1.3050  | -4.8557 | 0.5597  |
| H   | 0.3860  | -4.8254 | -0.0252 |
| H   | 0.9989  | -4.8076 | 1.6119  |
| C   | 2.1320  | -3.6006 | 0.2578  |
| H   | 3.0161  | -3.5978 | 0.9054  |
| H   | 2.4868  | -3.5692 | -0.7753 |
| C   | 1.3137  | -2.3441 | 0.5728  |
| O   | 1.3002  | -1.3892 | -0.2681 |
| O   | 0.6890  | -2.3442 | 1.6625  |
| O   | -1.4051 | -0.6769 | -0.5057 |
| O   | -0.1196 | 0.1813  | 1.7904  |
| H   | -1.2036 | -3.3465 | 0.7864  |
| H   | 0.2193  | -0.7140 | 1.9888  |
| O   | -1.6257 | -3.3696 | -0.0819 |
| H   | -1.3795 | -2.4820 | -0.4163 |
| C   | 0.2128  | 3.2181  | -4.7041 |
| C   | -1.6856 | 3.4550  | 2.2036  |
| C   | 5.4471  | 1.9052  | -0.7824 |
| N   | -3.8936 | 0.8716  | -4.9055 |
| Cps | 1.3823  | 4.2126  | -4.5599 |
| Cps | -1.9456 | 4.7626  | 1.4533  |
| Cps | 5.6994  | 2.2061  | -2.2754 |
| Cps | -3.3635 | 0.2676  | -6.0801 |

TS<sub>R11</sub><sup>OH</sup> (<sup>15</sup>Fe<sup>III</sup>-O<sub>F</sub>)

|   |         |         |         |
|---|---------|---------|---------|
| H | -0.7450 | 3.7005  | -4.5213 |
| H | 0.1620  | 2.8116  | -5.7132 |
| C | 0.2402  | 2.0408  | -3.7702 |
| N | 0.8833  | 0.8496  | -4.0415 |
| H | 1.3574  | 0.6258  | -4.9155 |
| C | 0.8412  | 0.0924  | -2.9207 |
| H | 1.2879  | -0.8848 | -2.8199 |
| N | 0.2062  | 0.7260  | -1.9564 |
| C | -0.1816 | 1.9313  | -2.4770 |
| H | -0.7051 | 2.6504  | -1.8665 |
| H | -0.6519 | 3.4366  | 2.6396  |
| H | -2.3589 | 3.2749  | 3.0131  |
| C | -1.7349 | 2.1880  | 1.3410  |
| O | -0.8966 | 2.0636  | 0.3945  |

|                                                                            |         |         |         |                                                                           |         |         |         |
|----------------------------------------------------------------------------|---------|---------|---------|---------------------------------------------------------------------------|---------|---------|---------|
| O                                                                          | -2.6488 | 1.3823  | 1.6235  | H                                                                         | -0.6210 | 2.6838  | -1.8217 |
| H                                                                          | 5.8051  | 0.8966  | -0.5693 | H                                                                         | -0.7609 | 3.4072  | 2.7094  |
| H                                                                          | 5.9804  | 2.5733  | -0.1384 | H                                                                         | -2.4845 | 3.2888  | 3.0024  |
| C                                                                          | 4.0015  | 1.9054  | -0.3384 | C                                                                         | -1.7871 | 2.1917  | 1.3465  |
| N                                                                          | 3.3783  | 2.9864  | 0.2560  | O                                                                         | -0.9089 | 2.0937  | 0.4455  |
| H                                                                          | 3.8292  | 3.8662  | 0.5104  | O                                                                         | -2.6982 | 1.3491  | 1.5765  |
| C                                                                          | 2.0929  | 2.6518  | 0.5000  | H                                                                         | 5.9359  | 0.8366  | -0.6598 |
| H                                                                          | 1.3813  | 3.3056  | 0.9774  | H                                                                         | 6.1259  | 2.4985  | -0.1792 |
| N                                                                          | 1.8460  | 1.4224  | 0.0875  | C                                                                         | 4.1419  | 1.8316  | -0.3088 |
| C                                                                          | 3.0287  | 0.9494  | -0.4256 | N                                                                         | 3.5432  | 2.9113  | 0.3113  |
| H                                                                          | 3.0970  | -0.0511 | -0.8225 | H                                                                         | 4.0044  | 3.7885  | 0.5553  |
| C                                                                          | -4.3686 | 2.1475  | -4.7210 | C                                                                         | 2.2653  | 2.5794  | 0.5932  |
| H                                                                          | -4.4809 | 2.8392  | -5.5446 | H                                                                         | 1.5714  | 3.2351  | 1.0955  |
| N                                                                          | -4.6479 | 2.3973  | -3.4621 | N                                                                         | 1.9998  | 1.3544  | 0.1804  |
| C                                                                          | -4.3486 | 1.2278  | -2.8045 | C                                                                         | 3.1629  | 0.8791  | -0.3726 |
| C                                                                          | -4.2808 | 0.9075  | -1.4284 | H                                                                         | 3.2099  | -0.1177 | -0.7842 |
| N                                                                          | -4.4763 | 1.7421  | -0.4312 | C                                                                         | -4.3662 | 2.1116  | -4.6874 |
| H                                                                          | -4.8477 | 2.6794  | -0.5791 | H                                                                         | -4.4728 | 2.7952  | -5.5177 |
| H                                                                          | -4.0120 | 1.5735  | 0.4692  | N                                                                         | -4.6646 | 2.3748  | -3.4374 |
| N                                                                          | -3.9295 | -0.4007 | -1.1841 | C                                                                         | -4.3723 | 1.2128  | -2.7657 |
| C                                                                          | -3.7053 | -0.8620 | 0.1566  | C                                                                         | -4.4174 | 0.8915  | -1.3886 |
| H                                                                          | -3.7226 | -1.9471 | 0.2002  | N                                                                         | -4.6587 | 1.7124  | -0.3868 |
| H                                                                          | -4.3423 | -0.3692 | 0.8810  | H                                                                         | -4.9644 | 2.6733  | -0.5367 |
| H                                                                          | -2.3451 | -0.6016 | 0.2586  | H                                                                         | -4.1972 | 1.5277  | 0.5131  |
| C                                                                          | -3.5282 | -1.2567 | -2.1835 | N                                                                         | -4.1576 | -0.4396 | -1.1209 |
| H                                                                          | -3.2151 | -2.2345 | -1.8334 | C                                                                         | -4.3757 | -0.9675 | 0.1475  |
| N                                                                          | -3.4815 | -0.9726 | -3.4466 | H                                                                         | -3.8937 | -1.9091 | 0.3837  |
| C                                                                          | -3.8928 | 0.2800  | -3.6951 | H                                                                         | -5.0885 | -0.4638 | 0.7817  |
| Fe                                                                         | 0.0511  | 0.3173  | 0.1065  | H                                                                         | -2.1506 | -0.2074 | 0.4029  |
| O                                                                          | 1.1210  | -7.1606 | -0.0498 | C                                                                         | -3.5965 | -1.2743 | -2.0806 |
| C                                                                          | 1.8494  | -6.2144 | 0.3628  | H                                                                         | -3.2897 | -2.2416 | -1.6992 |
| O                                                                          | 3.0577  | -6.3588 | 0.6860  | N                                                                         | -3.4525 | -0.9800 | -3.3335 |
| C                                                                          | 1.1690  | -4.8517 | 0.5299  | C                                                                         | -3.8826 | 0.2579  | -3.6370 |
| H                                                                          | 0.2569  | -4.8523 | -0.0666 | Fe                                                                        | 0.0848  | 0.2019  | 0.2691  |
| H                                                                          | 0.8524  | -4.7912 | 1.5781  | O                                                                         | 0.9707  | -7.2976 | -0.0982 |
| C                                                                          | 1.9646  | -3.5776 | 0.2125  | C                                                                         | 1.6818  | -6.3336 | 0.3020  |
| H                                                                          | 2.8820  | -3.5786 | 0.8117  | O                                                                         | 2.8777  | -6.4481 | 0.6779  |
| H                                                                          | 2.2644  | -3.5228 | -0.8371 | C                                                                         | 1.0004  | -4.9721 | 0.3858  |
| C                                                                          | 1.1542  | -2.3323 | 0.6049  | H                                                                         | 0.1350  | -4.9569 | -0.2803 |
| O                                                                          | 1.1620  | -1.3247 | -0.1916 | H                                                                         | 0.6104  | -4.8924 | 1.4072  |
| O                                                                          | 0.5411  | -2.3826 | 1.6898  | C                                                                         | 1.8672  | -3.7466 | 0.1107  |
| O                                                                          | -1.3341 | -0.6898 | -0.2560 | H                                                                         | 2.8060  | -3.8494 | 0.6663  |
| O                                                                          | 0.0529  | 0.2359  | 1.8857  | H                                                                         | 2.1248  | -3.6557 | -0.9476 |
| H                                                                          | -1.4775 | -3.4549 | 0.6693  | C                                                                         | 1.1627  | -2.4781 | 0.5816  |
| H                                                                          | 0.2369  | -0.6950 | 2.0914  | O                                                                         | 1.2056  | -1.4525 | -0.1857 |
| O                                                                          | -1.7368 | -3.3566 | -0.2544 | O                                                                         | 0.5824  | -2.5106 | 1.6867  |
| H                                                                          | -1.4186 | -2.4413 | -0.4215 | O                                                                         | -1.5516 | -0.6391 | -0.2238 |
| C                                                                          | 0.2158  | 3.2041  | -4.6930 | O                                                                         | -0.0129 | 0.1379  | 2.1076  |
| C                                                                          | -1.6550 | 3.4480  | 2.1952  | H                                                                         | -1.4288 | -3.3596 | 1.0319  |
| C                                                                          | 5.4261  | 1.8924  | -0.7961 | H                                                                         | 0.2541  | -0.7640 | 2.3451  |
| N                                                                          | -3.8965 | 0.8833  | -4.9000 | O                                                                         | -1.9750 | -3.2263 | 0.2477  |
| Cps                                                                        | 1.3799  | 4.2079  | -4.5575 | H                                                                         | -1.7201 | -2.3002 | 0.0018  |
| Cps                                                                        | -1.9461 | 4.7620  | 1.4618  | C                                                                         | 0.2276  | 3.2589  | -4.6769 |
| Cps                                                                        | 5.6945  | 2.2149  | -2.2824 | C                                                                         | -1.7401 | 3.4408  | 2.2158  |
| Cps                                                                        | -3.3734 | 0.2747  | -6.0744 | C                                                                         | 5.5408  | 1.8379  | -0.8312 |
|                                                                            |         |         |         | N                                                                         | -3.8821 | 0.8495  | -4.8582 |
|                                                                            |         |         |         | Cps                                                                       | 1.4099  | 4.2437  | -4.5570 |
|                                                                            |         |         |         | Cps                                                                       | -1.9573 | 4.7560  | 1.4578  |
|                                                                            |         |         |         | Cps                                                                       | 5.7250  | 2.2168  | -2.3152 |
|                                                                            |         |         |         | Cps                                                                       | -3.3757 | 0.2655  | -6.0629 |
| $\Pi^{\text{OH}}(^{\text{HS}}\text{Fe}^{\text{III}}\text{-O}_{\text{AF}})$ |         |         |         | $\Pi^{\text{OH}}(^{\text{IS}}\text{Fe}^{\text{III}}\text{-O}_{\text{F}})$ |         |         |         |
| H                                                                          | -0.7213 | 3.7683  | -4.4760 | H                                                                         | -0.7274 | 3.7470  | -4.4920 |
| H                                                                          | 0.1426  | 2.8780  | -5.6989 | H                                                                         | 0.1475  | 2.8633  | -5.7123 |
| C                                                                          | 0.2551  | 2.0867  | -3.7660 | C                                                                         | 0.2540  | 2.0700  | -3.7796 |
| N                                                                          | 0.8644  | 0.8868  | -4.0738 | N                                                                         | 0.8792  | 0.8744  | -4.0768 |
| H                                                                          | 1.3153  | 0.6668  | -4.9602 | H                                                                         | 1.3267  | 0.6506  | -4.9642 |
| C                                                                          | 0.8374  | 0.1164  | -2.9601 | C                                                                         | 0.8726  | 0.1131  | -2.9606 |
| H                                                                          | 1.2596  | -0.8747 | -2.8899 | H                                                                         | 1.3114  | -0.8687 | -2.8631 |
| N                                                                          | 0.2455  | 0.7459  | -1.9691 |                                                                           |         |         |         |
| C                                                                          | -0.1292 | 1.9656  | -2.4603 |                                                                           |         |         |         |

|                                                                      |         |         |         |                                                                     |         |         |         |
|----------------------------------------------------------------------|---------|---------|---------|---------------------------------------------------------------------|---------|---------|---------|
| N                                                                    | 0.2740  | 0.7518  | -1.9766 | N                                                                   | 0.8795  | 0.8767  | -4.0710 |
| C                                                                    | -0.1275 | 1.9613  | -2.4743 | H                                                                   | 1.3276  | 0.6515  | -4.9578 |
| H                                                                    | -0.6302 | 2.6727  | -1.8375 | C                                                                   | 0.8692  | 0.1158  | -2.9544 |
| H                                                                    | -0.7812 | 3.3915  | 2.7029  | H                                                                   | 1.3063  | -0.8667 | -2.8568 |
| H                                                                    | -2.5035 | 3.2763  | 2.9839  | N                                                                   | 0.2705  | 0.7558  | -1.9713 |
| C                                                                    | -1.7989 | 2.2199  | 1.2944  | C                                                                   | -0.1270 | 1.9663  | -2.4704 |
| O                                                                    | -1.0203 | 2.2094  | 0.3174  | H                                                                   | -0.6297 | 2.6788  | -1.8350 |
| O                                                                    | -2.6400 | 1.3086  | 1.5834  | H                                                                   | -0.7799 | 3.3811  | 2.6934  |
| H                                                                    | 5.9514  | 0.8534  | -0.6399 | H                                                                   | -2.5012 | 3.2742  | 2.9838  |
| H                                                                    | 6.1123  | 2.5218  | -0.1683 | C                                                                   | -1.8112 | 2.2180  | 1.2883  |
| C                                                                    | 4.1375  | 1.8231  | -0.3167 | O                                                                   | -1.0420 | 2.2085  | 0.3040  |
| N                                                                    | 3.5099  | 2.8939  | 0.2917  | O                                                                   | -2.6525 | 1.3082  | 1.5807  |
| H                                                                    | 3.9581  | 3.7712  | 0.5588  | H                                                                   | 5.9412  | 0.8522  | -0.6404 |
| C                                                                    | 2.2238  | 2.5582  | 0.5188  | H                                                                   | 6.1080  | 2.5199  | -0.1686 |
| H                                                                    | 1.5057  | 3.1986  | 1.0061  | C                                                                   | 4.1311  | 1.8281  | -0.3179 |
| N                                                                    | 1.9856  | 1.3364  | 0.0768  | N                                                                   | 3.5069  | 2.8996  | 0.2926  |
| C                                                                    | 3.1703  | 0.8654  | -0.4310 | H                                                                   | 3.9570  | 3.7763  | 0.5586  |
| H                                                                    | 3.2339  | -0.1307 | -0.8419 | C                                                                   | 2.2207  | 2.5659  | 0.5228  |
| C                                                                    | -4.3936 | 2.0802  | -4.6644 | H                                                                   | 1.5057  | 3.2072  | 1.0133  |
| H                                                                    | -4.5455 | 2.7578  | -5.4926 | N                                                                   | 1.9793  | 1.3446  | 0.0811  |
| N                                                                    | -4.6704 | 2.3364  | -3.4079 | C                                                                   | 3.1621  | 0.8721  | -0.4298 |
| C                                                                    | -4.3190 | 1.1880  | -2.7407 | H                                                                   | 3.2238  | -0.1242 | -0.8402 |
| C                                                                    | -4.3320 | 0.8640  | -1.3637 | C                                                                   | -4.4013 | 2.0821  | -4.6692 |
| N                                                                    | -4.6020 | 1.6663  | -0.3559 | H                                                                   | -4.5591 | 2.7556  | -5.4996 |
| H                                                                    | -4.9495 | 2.6147  | -0.4977 | N                                                                   | -4.6768 | 2.3418  | -3.4131 |
| H                                                                    | -4.1184 | 1.4909  | 0.5374  | C                                                                   | -4.3181 | 1.1978  | -2.7420 |
| N                                                                    | -4.0098 | -0.4565 | -1.1009 | C                                                                   | -4.3316 | 0.8774  | -1.3640 |
| C                                                                    | -4.2196 | -1.0011 | 0.1619  | N                                                                   | -4.6091 | 1.6799  | -0.3586 |
| H                                                                    | -3.7070 | -1.9287 | 0.3938  | H                                                                   | -4.9563 | 2.6279  | -0.5034 |
| H                                                                    | -4.9497 | -0.5207 | 0.7945  | H                                                                   | -4.1292 | 1.5050  | 0.5371  |
| H                                                                    | -1.9361 | -0.0581 | 0.3978  | N                                                                   | -4.0040 | -0.4412 | -1.0969 |
| C                                                                    | -3.4271 | -1.2670 | -2.0692 | C                                                                   | -4.2178 | -0.9850 | 0.1655  |
| H                                                                    | -3.0658 | -2.2182 | -1.6913 | H                                                                   | -3.7030 | -1.9096 | 0.4053  |
| N                                                                    | -3.3184 | -0.9653 | -3.3248 | H                                                                   | -4.9518 | -0.5054 | 0.7941  |
| C                                                                    | -3.8110 | 0.2510  | -3.6208 | H                                                                   | -1.9427 | -0.0568 | 0.3949  |
| Fe                                                                   | 0.2493  | 0.2796  | 0.0654  | C                                                                   | -3.4135 | -1.2496 | -2.0620 |
| O                                                                    | 0.9460  | -7.3566 | -0.1198 | H                                                                   | -3.0479 | -2.1975 | -1.6816 |
| C                                                                    | 1.6642  | -6.3927 | 0.2681  | N                                                                   | -3.3059 | -0.9518 | -3.3187 |
| O                                                                    | 2.8478  | -6.5182 | 0.6775  | C                                                                   | -3.8062 | 0.2604  | -3.6194 |
| C                                                                    | 1.0164  | -5.0141 | 0.2869  | Fe                                                                  | 0.2417  | 0.2879  | 0.0756  |
| H                                                                    | 0.1430  | -5.0137 | -0.3692 | O                                                                   | 0.9532  | -7.3160 | -0.0968 |
| H                                                                    | 0.6468  | -4.8685 | 1.3087  | C                                                                   | 1.6751  | -6.3633 | 0.3103  |
| C                                                                    | 1.9144  | -3.8329 | -0.0664 | O                                                                   | 2.8658  | -6.4985 | 0.6981  |
| H                                                                    | 2.8572  | -3.9374 | 0.4823  | C                                                                   | 1.0341  | -4.9835 | 0.3819  |
| H                                                                    | 2.1617  | -3.8136 | -1.1314 | H                                                                   | 0.1270  | -4.9665 | -0.2257 |
| C                                                                    | 1.2628  | -2.5091 | 0.3338  | H                                                                   | 0.7221  | -4.8422 | 1.4230  |
| O                                                                    | 1.3562  | -1.5268 | -0.4649 | C                                                                   | 1.9251  | -3.8089 | -0.0111 |
| O                                                                    | 0.6754  | -2.4799 | 1.4452  | H                                                                   | 2.8832  | -3.9094 | 0.5111  |
| O                                                                    | -1.3512 | -0.5700 | -0.1820 | H                                                                   | 2.1402  | -3.8033 | -1.0832 |
| O                                                                    | 0.2720  | 0.1640  | 1.8346  | C                                                                   | 1.2868  | -2.4801 | 0.3903  |
| H                                                                    | -1.2828 | -3.3803 | 0.8839  | O                                                                   | 1.3507  | -1.5127 | -0.4300 |
| H                                                                    | 0.3608  | -0.8007 | 1.9720  | O                                                                   | 0.7383  | -2.4312 | 1.5204  |
| O                                                                    | -1.8757 | -3.1410 | 0.1608  | O                                                                   | -1.3515 | -0.5758 | -0.1723 |
| H                                                                    | -1.5754 | -2.2098 | -0.0056 | O                                                                   | 0.2513  | 0.2037  | 1.8471  |
| C                                                                    | 0.2245  | 3.2425  | -4.6894 | H                                                                   | -1.2867 | -3.3473 | 1.0172  |
| C                                                                    | -1.7568 | 3.4411  | 2.2015  | H                                                                   | 0.3866  | -0.7533 | 2.0029  |
| C                                                                    | 5.5429  | 1.8478  | -0.8201 | O                                                                   | -1.8704 | -3.1350 | 0.2789  |
| N                                                                    | -3.8665 | 0.8368  | -4.8438 | H                                                                   | -1.5674 | -2.2135 | 0.0717  |
| Cps                                                                  | 1.4021  | 4.2320  | -4.5596 | C                                                                   | 0.2273  | 3.2456  | -4.6868 |
| Cps                                                                  | -1.9590 | 4.7684  | 1.4636  | C                                                                   | -1.7580 | 3.4362  | 2.1974  |
| Cps                                                                  | 5.7256  | 2.2190  | -2.3065 | C                                                                   | 5.5367  | 1.8480  | -0.8209 |
| Cps                                                                  | -3.3708 | 0.2643  | -6.0581 | N                                                                   | -3.8677 | 0.8408  | -4.8449 |
|                                                                      |         |         |         | Cps                                                                 | 1.4046  | 4.2360  | -4.5596 |
|                                                                      |         |         |         | Cps                                                                 | -1.9586 | 4.7636  | 1.4599  |
|                                                                      |         |         |         | Cps                                                                 | 5.7233  | 2.2180  | -2.3070 |
|                                                                      |         |         |         | Cps                                                                 | -3.3725 | 0.2652  | -6.0583 |
| $\Pi^{\text{OH}} (^{54}\text{Fe}^{\text{III}}\text{-O}_{\text{AF}})$ |         |         |         |                                                                     |         |         |         |
| H                                                                    | -0.7245 | -3.7502 | 4.4893  |                                                                     |         |         |         |
| H                                                                    | 0.1496  | 2.8649  | -5.7092 |                                                                     |         |         |         |
| C                                                                    | 0.2566  | 2.0739  | -3.7753 |                                                                     |         |         |         |
|                                                                      |         |         |         | $\Pi^{\text{OH}} (^{56}\text{Fe}^{\text{III}}\text{-O}_{\text{F}})$ |         |         |         |

|     |         |         |         |                                  |         |         |         |
|-----|---------|---------|---------|----------------------------------|---------|---------|---------|
| H   | -0.7150 | 3.7198  | -4.4562 | TS <sub>1114</sub> <sup>OH</sup> |         |         |         |
| H   | 0.1614  | 2.8131  | -5.6580 |                                  |         |         |         |
| C   | 0.2890  | 2.0692  | -3.7078 | H                                | -0.7337 | 3.8167  | -4.5641 |
| N   | 0.8711  | 0.8524  | -4.0065 | H                                | 0.1578  | 2.9374  | -5.7742 |
| H   | 1.3096  | 0.6165  | -4.8948 | C                                | 0.1917  | 2.1102  | -3.8549 |
| C   | 0.8590  | 0.1000  | -2.8813 | N                                | 0.8624  | 0.9341  | -4.1253 |
| H   | 1.2648  | -0.8961 | -2.7924 | H                                | 1.3530  | 0.7216  | -4.9935 |
| N   | 0.3015  | 0.7608  | -1.8894 | C                                | 0.7901  | 0.1532  | -3.0282 |
| C   | -0.0673 | 1.9782  | -2.3926 | H                                | 1.2508  | -0.8174 | -2.9234 |
| H   | -0.5334 | 2.7128  | -1.7544 | N                                | 0.1054  | 0.7591  | -2.0785 |
| H   | -0.7121 | 3.4603  | 2.7239  | C                                | -0.2791 | 1.9719  | -2.5828 |
| H   | -2.4334 | 3.2696  | 2.9977  | H                                | -0.8332 | 2.6699  | -1.9739 |
| C   | -1.6715 | 2.1771  | 1.3708  | H                                | -0.6798 | 3.4149  | 2.6322  |
| O   | -0.7611 | 2.0828  | 0.5029  | H                                | -2.3871 | 3.2801  | 3.0172  |
| O   | -2.5815 | 1.3295  | 1.5957  | C                                | -1.8115 | 2.2136  | 1.3055  |
| H   | 5.9176  | 0.8327  | -0.6540 | O                                | -0.9519 | 2.0860  | 0.3747  |
| H   | 6.0978  | 2.4946  | -0.1683 | O                                | -2.7755 | 1.4523  | 1.5340  |
| C   | 4.1169  | 1.8203  | -0.3134 | H                                | 5.8926  | 0.8743  | -0.6176 |
| N   | 3.5155  | 2.8912  | 0.3210  | H                                | 6.0884  | 2.5472  | -0.1768 |
| H   | 3.9748  | 3.7664  | 0.5748  | C                                | 4.0993  | 1.8875  | -0.3216 |
| C   | 2.2367  | 2.5580  | 0.5955  | N                                | 3.4766  | 2.9858  | 0.2423  |
| H   | 1.5385  | 3.2025  | 1.1049  | H                                | 3.9295  | 3.8705  | 0.4772  |
| N   | 1.9734  | 1.3388  | 0.1635  | C                                | 2.1966  | 2.6510  | 0.5132  |
| C   | 3.1385  | 0.8682  | -0.3907 | H                                | 1.4885  | 3.3254  | 0.9695  |
| H   | 3.1851  | -0.1248 | -0.8105 | N                                | 1.9484  | 1.4024  | 0.1547  |
| C   | -4.3749 | 2.0994  | -4.6756 | C                                | 3.1318  | 0.9227  | -0.3587 |
| H   | -4.5119 | 2.7762  | -5.5069 | H                                | 3.2015  | -0.0891 | -0.7257 |
| N   | -4.6510 | 2.3656  | -3.4211 | C                                | -4.4151 | 2.1201  | -4.7345 |
| C   | -4.3228 | 1.2140  | -2.7479 | H                                | -4.5884 | 2.7705  | -5.5804 |
| C   | -4.3373 | 0.8988  | -1.3692 | N                                | -4.6851 | 2.4075  | -3.4825 |
| N   | -4.5771 | 1.7191  | -0.3655 | C                                | -4.3081 | 1.2857  | -2.7836 |
| H   | -4.9138 | 2.6707  | -0.5101 | C                                | -4.3110 | 1.0011  | -1.4001 |
| H   | -4.1067 | 1.5400  | 0.5298  | N                                | -4.6156 | 1.8289  | -0.4229 |
| N   | -4.0497 | -0.4260 | -1.0992 | H                                | -4.9724 | 2.7659  | -0.6000 |
| C   | -4.2613 | -0.9561 | 0.1686  | H                                | -4.1418 | 1.6888  | 0.4816  |
| H   | -3.7580 | -1.8882 | 0.4025  | N                                | -3.9544 | -0.3030 | -1.0975 |
| H   | -4.9734 | -0.4541 | 0.8050  | C                                | -4.1267 | -0.8184 | 0.1749  |
| H   | -1.9934 | -0.0631 | 0.4296  | H                                | -3.6920 | -1.7842 | 0.3842  |
| C   | -3.4845 | -1.2552 | -2.0628 | H                                | -4.7437 | -0.2671 | 0.8630  |
| H   | -3.1456 | -2.2120 | -1.6782 | H                                | -1.2225 | -0.6173 | 1.2076  |
| N   | -3.3670 | -0.9621 | -3.3199 | C                                | -3.3785 | -1.1321 | -2.0513 |
| C   | -3.8317 | 0.2629  | -3.6232 | H                                | -3.0139 | -2.0716 | -1.6566 |
| Fe  | 0.1879  | 0.3208  | 0.1386  | N                                | -3.2822 | -0.8657 | -3.3176 |
| O   | 0.9818  | -7.2723 | -0.1187 | C                                | -3.7923 | 0.3339  | -3.6397 |
| C   | 1.6832  | -6.2829 | 0.2414  | Fe                               | -0.0174 | 0.2277  | 0.0010  |
| O   | 2.8737  | -6.3769 | 0.6356  | O                                | 0.9685  | -7.1600 | -0.0726 |
| C   | 0.9797  | -4.9248 | 0.2526  | C                                | 1.7162  | -6.2486 | 0.3757  |
| H   | 0.1328  | -4.9569 | -0.4368 | O                                | 2.9196  | -6.4335 | 0.7048  |
| H   | 0.5607  | -4.8237 | 1.2609  | C                                | 1.1144  | -4.8557 | 0.5763  |
| C   | 1.8162  | -3.6767 | -0.0320 | H                                | 0.1321  | -4.8041 | 0.1068  |
| H   | 2.7686  | -3.7714 | 0.5017  | H                                | 0.9520  | -4.7290 | 1.6532  |
| H   | 2.0495  | -3.5729 | -1.0951 | C                                | 1.9694  | -3.6749 | 0.0960  |
| C   | 1.1104  | -2.4148 | 0.4770  | H                                | 2.9522  | -3.7509 | 0.5727  |
| O   | 1.1467  | -1.3732 | -0.2632 | H                                | 2.1297  | -3.6939 | -0.9848 |
| O   | 0.5526  | -2.4921 | 1.5932  | C                                | 1.3326  | -2.3473 | 0.5091  |
| O   | -1.4120 | -0.5113 | -0.2004 | O                                | 1.2955  | -1.3846 | -0.3360 |
| O   | 0.1468  | 0.1521  | 1.9177  | O                                | 0.8774  | -2.2788 | 1.6676  |
| H   | -1.4022 | -3.3028 | 0.8766  | O                                | -1.4361 | -0.8620 | 0.0082  |
| H   | 0.3092  | -0.7873 | 2.0917  | O                                | -0.5210 | -0.0913 | 2.0319  |
| O   | -1.9256 | -3.0737 | 0.0993  | H                                | -1.5984 | -3.5542 | 1.1743  |
| H   | -1.6211 | -2.1358 | -0.0533 | H                                | 0.1003  | -0.8161 | 2.2322  |
| C   | 0.2420  | 3.2218  | -4.6462 | O                                | -1.9454 | -3.4225 | 0.2863  |
| C   | -1.6860 | 3.4456  | 2.2190  | H                                | -1.6232 | -2.5048 | 0.0793  |
| C   | 5.5214  | 1.8333  | -0.8269 | C                                | 0.2127  | 3.2957  | -4.7429 |
| N   | -3.8702 | 0.8458  | -4.8488 | C                                | -1.6855 | 3.4431  | 2.1946  |
| Cps | 1.4049  | 4.2342  | -4.5527 | C                                | 5.5100  | 1.8737  | -0.8218 |
| Cps | -1.9514 | 4.7507  | 1.4557  | N                                | -3.8687 | 0.8808  | -4.8774 |
| Cps | 5.7223  | 2.2154  | -2.3102 | Cps                              | 1.4104  | 4.2478  | -4.5647 |
| Cps | -3.3752 | 0.2645  | -6.0600 | Cps                              | -1.9585 | 4.7563  | 1.4542  |
|     |         |         |         | Cps                              | 5.7265  | 2.2164  | -2.3130 |

|                  |         |         |         |                                  |         |         |         |
|------------------|---------|---------|---------|----------------------------------|---------|---------|---------|
| Cps              | -3.3716 | 0.2629  | -6.0657 | Cps                              | 1.4052  | 4.2429  | -4.5645 |
|                  |         |         |         | Cps                              | -1.9503 | 4.7806  | 1.4566  |
|                  |         |         |         | Cps                              | 5.7104  | 2.2108  | -2.2950 |
| I4 <sup>OH</sup> |         |         |         | Cps                              | -3.3686 | 0.2676  | -6.0631 |
| H                | -0.7378 | 3.8157  | -4.5358 |                                  |         |         |         |
| H                | 0.1349  | 2.9297  | -5.7547 | TS <sub>1112</sub> <sup>OH</sup> |         |         |         |
| C                | 0.1830  | 2.1042  | -3.8371 | H                                | -0.7516 | 3.7532  | -4.5091 |
| N                | 0.8116  | 0.9113  | -4.1312 | H                                | 0.1367  | 2.8296  | -5.6879 |
| H                | 1.2989  | 0.7009  | -5.0011 | C                                | 0.1778  | 2.0774  | -3.7389 |
| C                | 0.7181  | 0.1152  | -3.0446 | N                                | 0.8304  | 0.8841  | -3.9811 |
| H                | 1.1442  | -0.8732 | -2.9598 | H                                | 1.3391  | 0.6567  | -4.8338 |
| N                | 0.0632  | 0.7275  | -2.0805 | C                                | 0.6851  | 0.1039  | -2.8867 |
| C                | -0.2808 | 1.9605  | -2.5617 | H                                | 1.1212  | -0.8771 | -2.7723 |
| H                | -0.8039 | 2.6691  | -1.9375 | N                                | -0.0266 | 0.7171  | -1.9598 |
| H                | -0.7125 | 3.5090  | 2.7367  | C                                | -0.3539 | 1.9420  | -2.4870 |
| H                | -2.4266 | 3.3407  | 3.0368  | H                                | -0.9277 | 2.6530  | -1.9122 |
| C                | -1.7022 | 2.2047  | 1.4350  | H                                | -0.6718 | 3.5103  | 2.7369  |
| O                | -0.9127 | 2.1011  | 0.4592  | H                                | -2.3822 | 3.3778  | 3.1012  |
| O                | -2.4852 | 1.3042  | 1.8388  | C                                | -1.7474 | 2.2143  | 1.4895  |
| H                | 5.9002  | 0.8296  | -0.6370 | O                                | -0.9713 | 2.0937  | 0.4875  |
| H                | 6.0692  | 2.4929  | -0.1503 | O                                | -2.5905 | 1.3701  | 1.8506  |
| C                | 4.0905  | 1.8119  | -0.3245 | H                                | 5.9040  | 0.8363  | -0.6552 |
| N                | 3.4717  | 2.8841  | 0.2878  | H                                | 6.0996  | 2.4982  | -0.1754 |
| H                | 3.9235  | 3.7591  | 0.5530  | C                                | 4.1104  | 1.8489  | -0.3390 |
| C                | 2.1825  | 2.5449  | 0.5178  | N                                | 3.5143  | 2.9337  | 0.2740  |
| H                | 1.4739  | 3.1965  | 1.0049  | H                                | 3.9841  | 3.8019  | 0.5358  |
| N                | 1.9267  | 1.3258  | 0.0822  | C                                | 2.2237  | 2.6264  | 0.5150  |
| C                | 3.1115  | 0.8616  | -0.4338 | H                                | 1.5322  | 3.2880  | 1.0130  |
| H                | 3.1777  | -0.1315 | -0.8521 | N                                | 1.9459  | 1.4099  | 0.0799  |
| C                | -4.3451 | 2.0971  | -4.6483 | C                                | 3.1154  | 0.9163  | -0.4430 |
| H                | -4.5089 | 2.7765  | -5.4729 | H                                | 3.1587  | -0.0796 | -0.8567 |
| N                | -4.5899 | 2.3565  | -3.3849 | C                                | -4.2977 | 2.1476  | -4.6701 |
| C                | -4.2358 | 1.2022  | -2.7240 | H                                | -4.4572 | 2.8352  | -5.4895 |
| C                | -4.2185 | 0.8726  | -1.3489 | N                                | -4.5073 | 2.4122  | -3.3978 |
| N                | -4.4538 | 1.6850  | -0.3309 | C                                | -4.1580 | 1.2479  | -2.7361 |
| H                | -4.8115 | 2.6299  | -0.4611 | C                                | -4.0752 | 0.9411  | -1.3768 |
| H                | -4.0008 | 1.4843  | 0.5630  | N                                | -4.3771 | 1.7476  | -0.3580 |
| N                | -3.9158 | -0.4495 | -1.0952 | H                                | -4.7968 | 2.6595  | -0.5221 |
| C                | -4.0259 | -0.9772 | 0.1798  | H                                | -3.9248 | 1.6290  | 0.5444  |
| H                | -3.6714 | -1.9855 | 0.3370  | N                                | -3.6835 | -0.3893 | -1.1160 |
| H                | -4.6551 | -0.4493 | 0.8787  | C                                | -3.4315 | -0.8611 | 0.1374  |
| H                | -1.6550 | -2.4793 | 0.0540  | H                                | -3.5421 | -1.9306 | 0.2631  |
| C                | -3.3774 | -1.2675 | -2.0794 | H                                | -3.7178 | -0.2261 | 0.9564  |
| H                | -3.0408 | -2.2307 | -1.7171 | H                                | -1.4093 | -1.2958 | 1.0818  |
| N                | -3.2932 | -0.9662 | -3.3397 | C                                | -3.3334 | -1.2542 | -2.1633 |
| C                | -3.7648 | 0.2587  | -3.6194 | H                                | -3.0408 | -2.2435 | -1.8372 |
| Fe               | -0.1044 | 0.1274  | -0.0140 | N                                | -3.3523 | -0.9589 | -3.4241 |
| O                | 0.9382  | -7.2844 | -0.1017 | C                                | -3.7591 | 0.2892  | -3.6572 |
| C                | 1.6567  | -6.3412 | 0.3301  | Fe                               | 0.0418  | 0.3223  | 0.3071  |
| O                | 2.8525  | -6.4833 | 0.7017  | O                                | 0.9782  | -7.2717 | -0.0924 |
| C                | 1.0070  | -4.9661 | 0.4583  | C                                | 1.6894  | -6.3181 | 0.3295  |
| H                | 0.0796  | -4.9365 | -0.1138 | O                                | 2.8826  | -6.4449 | 0.7086  |
| H                | 0.7298  | -4.8524 | 1.5126  | C                                | 1.0011  | -4.9574 | 0.4367  |
| C                | 1.8766  | -3.7742 | 0.0594  | H                                | 0.1361  | -4.9545 | -0.2281 |
| H                | 2.8438  | -3.8671 | 0.5651  | H                                | 0.6051  | -4.9023 | 1.4576  |
| H                | 2.0717  | -3.7570 | -1.0159 | C                                | 1.8404  | -3.7043 | 0.1822  |
| C                | 1.2346  | -2.4549 | 0.4751  | H                                | 2.7594  | -3.7673 | 0.7759  |
| O                | 1.2396  | -1.4866 | -0.3447 | H                                | 2.1411  | -3.6166 | -0.8649 |
| O                | 0.7356  | -2.3997 | 1.6316  | C                                | 1.0823  | -2.4434 | 0.6042  |
| O                | -1.4905 | -0.8753 | -0.0968 | O                                | 1.1327  | -1.4212 | -0.1612 |
| O                | 0.1616  | 0.0458  | 2.1265  | O                                | 0.4407  | -2.4885 | 1.6830  |
| H                | 0.3871  | -0.9315 | 2.1113  | O                                | -1.5750 | -0.8853 | 0.2201  |
| H                | -0.7523 | 0.1118  | 2.4256  | O                                | 0.1479  | 0.2289  | 2.1362  |
| O                | -1.9376 | -3.4250 | 0.2329  | H                                | -1.4512 | -3.7019 | 1.1061  |
| H                | -1.5266 | -3.5927 | 1.0872  | H                                | 0.4266  | -0.6529 | 2.4165  |
| C                | 0.2046  | 3.2907  | -4.7252 | O                                | -1.9624 | -3.6519 | 0.2883  |
| C                | -1.6936 | 3.4974  | 2.2404  | H                                | -1.5908 | -2.8573 | -0.1236 |
| C                | 5.5015  | 1.8288  | -0.8140 | C                                | 0.1982  | 3.2346  | -4.6737 |
| N                | -3.8399 | 0.8476  | -4.8414 |                                  |         |         |         |

|                  |         |         |         |                                  |         |         |         |
|------------------|---------|---------|---------|----------------------------------|---------|---------|---------|
| C                | -1.6709 | 3.5013  | 2.2802  | O                                | -2.0783 | -3.7971 | 0.4821  |
| C                | 5.5204  | 1.8406  | -0.8353 | H                                | -2.1501 | -4.1380 | 1.3857  |
| N                | -3.8405 | 0.8880  | -4.8705 | C                                | 0.1625  | 3.2442  | -4.6928 |
| Cps              | 1.3856  | 4.2172  | -4.5568 | C                                | -1.6839 | 3.5704  | 2.3241  |
| Cps              | -1.9441 | 4.7565  | 1.4558  | C                                | 5.4909  | 1.8288  | -0.8158 |
| Cps              | 5.7249  | 2.2157  | -2.3171 | N                                | -3.7881 | 0.8509  | -4.9067 |
| Cps              | -3.3762 | 0.2634  | -6.0631 | Cps                              | 1.3664  | 4.2010  | -4.5607 |
|                  |         |         |         | Cps                              | -1.9309 | 4.8105  | 1.4764  |
|                  |         |         |         | Cps                              | 5.7020  | 2.2091  | -2.2954 |
|                  |         |         |         | Cps                              | -3.3557 | 0.2692  | -6.1388 |
| 12 <sup>OH</sup> |         |         |         |                                  |         |         |         |
| H                | -0.7777 | 3.7757  | -4.5102 | TS <sub>1215</sub> <sup>OH</sup> |         |         |         |
| H                | 0.0878  | 2.8652  | -5.7160 | H                                | -0.7808 | 3.7577  | -4.4751 |
| C                | 0.1258  | 2.0681  | -3.7870 | H                                | 0.0732  | 2.8261  | -5.6715 |
| N                | 0.7762  | 0.8776  | -4.0495 | C                                | 0.1373  | 2.0659  | -3.7259 |
| H                | 1.3000  | 0.6686  | -4.8980 | N                                | 0.7499  | 0.8555  | -3.9948 |
| C                | 0.6174  | 0.0736  | -2.9756 | H                                | 1.2521  | 0.6308  | -4.8528 |
| H                | 1.0497  | -0.9104 | -2.8652 | C                                | 0.6029  | 0.0611  | -2.9133 |
| N                | -0.1036 | 0.6695  | -2.0452 | H                                | 1.0142  | -0.9326 | -2.8141 |
| C                | -0.4177 | 1.9080  | -2.5436 | N                                | -0.0779 | 0.6827  | -1.9656 |
| H                | -0.9778 | 2.6141  | -1.9477 | C                                | -0.3762 | 1.9280  | -2.4667 |
| H                | -0.7093 | 3.6051  | 2.8363  | H                                | -0.9125 | 2.6461  | -1.8640 |
| H                | -2.4271 | 3.4524  | 3.1169  | H                                | -0.7047 | 3.8777  | 3.0241  |
| C                | -1.6669 | 2.2367  | 1.5988  | H                                | -2.3948 | 3.5366  | 3.1961  |
| O                | -1.0481 | 2.1238  | 0.5113  | C                                | -1.3489 | 2.2904  | 1.9106  |
| O                | -2.2801 | 1.3019  | 2.1831  | O                                | -0.8608 | 2.1311  | 0.7506  |
| H                | 5.8863  | 0.8288  | -0.6387 | O                                | -1.5513 | 1.3994  | 2.7655  |
| H                | 6.0593  | 2.4906  | -0.1507 | H                                | 5.9783  | 0.8624  | -0.6216 |
| C                | 4.0788  | 1.8194  | -0.3286 | H                                | 6.1635  | 2.5355  | -0.1791 |
| N                | 3.4741  | 2.8936  | 0.2943  | C                                | 4.1794  | 1.8601  | -0.2792 |
| H                | 3.9360  | 3.7638  | 0.5601  | N                                | 3.5673  | 2.9689  | 0.2696  |
| C                | 2.1822  | 2.5738  | 0.5218  | H                                | 4.0314  | 3.8441  | 0.5167  |
| H                | 1.4843  | 3.2273  | 1.0216  | C                                | 2.2703  | 2.6724  | 0.4779  |
| N                | 1.9118  | 1.3625  | 0.0720  | H                                | 1.5584  | 3.3493  | 0.9235  |
| C                | 3.0882  | 0.8827  | -0.4486 | N                                | 2.0091  | 1.4406  | 0.0813  |
| H                | 3.1361  | -0.1088 | -0.8740 | C                                | 3.1917  | 0.9233  | -0.3796 |
| C                | -4.4164 | 2.0403  | -4.6876 | H                                | 3.2449  | -0.0867 | -0.7581 |
| H                | -4.7326 | 2.6801  | -5.4990 | C                                | -4.2691 | 2.1385  | -4.7268 |
| N                | -4.5651 | 2.3009  | -3.4094 | H                                | -4.4307 | 2.8198  | -5.5502 |
| C                | -4.0100 | 1.2173  | -2.7690 | N                                | -4.4838 | 2.4044  | -3.4600 |
| C                | -3.8117 | 0.9224  | -1.3939 | C                                | -4.1524 | 1.2418  | -2.8037 |
| N                | -4.1526 | 1.7123  | -0.3937 | C                                | -4.1025 | 0.8916  | -1.4302 |
| H                | -4.6604 | 2.5858  | -0.5239 | N                                | -4.2400 | 1.6634  | -0.3732 |
| H                | -3.8321 | 1.5180  | 0.5482  | H                                | -4.6111 | 2.6121  | -0.4033 |
| N                | -3.2113 | -0.2854 | -1.1810 | H                                | -3.8660 | 1.2646  | 0.5000  |
| C                | -2.8835 | -0.8740 | 0.2166  | N                                | -3.8469 | -0.4377 | -1.2220 |
| H                | -3.4584 | -1.8127 | 0.2295  | C                                | -3.9708 | -0.9422 | 0.2416  |
| H                | -3.3332 | -0.1706 | 0.9239  | H                                | -3.9446 | -2.0380 | 0.1267  |
| H                | -1.5966 | -2.9509 | 0.5500  | H                                | -5.0083 | -0.6490 | 0.4922  |
| C                | -2.7595 | -1.0795 | -2.1935 | H                                | -1.9814 | -1.7455 | 0.4877  |
| H                | -2.2483 | -1.9716 | -1.8462 | C                                | -3.4016 | -1.2711 | -2.1932 |
| N                | -2.8844 | -0.8466 | -3.4673 | H                                | -3.0796 | -2.2449 | -1.8353 |
| C                | -3.5208 | 0.3143  | -3.6936 | N                                | -3.3063 | -0.9715 | -3.4622 |
| Fe               | 0.0056  | 0.2151  | 0.0945  | C                                | -3.7326 | 0.2785  | -3.7074 |
| O                | 1.0271  | -7.2774 | -0.0765 | Fe                               | 0.1951  | 0.3796  | 0.1656  |
| C                | 1.7404  | -6.3621 | 0.4195  | O                                | 1.0404  | -7.3527 | -0.0224 |
| O                | 2.9525  | -6.5193 | 0.7335  | C                                | 1.7523  | -6.3859 | 0.3709  |
| C                | 1.1046  | -4.9999 | 0.6891  | O                                | 2.9340  | -6.5016 | 0.7818  |
| H                | 0.0485  | -5.0098 | 0.4243  | C                                | 1.0894  | -5.0134 | 0.3983  |
| H                | 1.1550  | -4.8236 | 1.7675  | H                                | 0.2214  | -5.0303 | -0.2647 |
| C                | 1.7908  | -3.8311 | -0.0244 | H                                | 0.7092  | -4.8833 | 1.4177  |
| H                | 2.8640  | -3.8619 | 0.1991  | C                                | 1.9700  | -3.8086 | 0.0603  |
| H                | 1.6888  | -3.9119 | -1.1103 | H                                | 2.9006  | -3.8950 | 0.6326  |
| C                | 1.2440  | -2.4723 | 0.4192  | H                                | 2.2364  | -3.7751 | -0.9990 |
| O                | 1.1365  | -1.5565 | -0.4524 | C                                | 1.2729  | -2.5140 | 0.4707  |
| O                | 0.9399  | -2.3435 | 1.6324  | O                                | 1.2757  | -1.5077 | -0.2908 |
| O                | -1.5771 | -1.0644 | 0.3540  | O                                | 0.7008  | -2.5608 | 1.6025  |
| O                | 0.3284  | 0.0972  | 2.2457  | O                                | -3.0104 | -0.4004 | 0.9743  |
| H                | 0.5413  | -0.8733 | 2.1751  |                                  |         |         |         |
| H                | -0.5873 | 0.1775  | 2.5378  |                                  |         |         |         |

|     |         |         |         |     |         |         |         |
|-----|---------|---------|---------|-----|---------|---------|---------|
| O   | 0.3388  | -0.1259 | 2.0974  | O   | 1.3967  | -1.5672 | -0.3546 |
| H   | 0.3780  | -1.1185 | 2.1160  | O   | 0.5653  | -2.5881 | 1.4600  |
| H   | -0.4646 | 0.2650  | 2.5299  | O   | -3.6137 | -0.2851 | 1.1252  |
| O   | -1.6798 | -2.5962 | 0.0962  | O   | 0.6137  | -0.0326 | 2.2735  |
| H   | -1.0060 | -2.8927 | 0.7208  | H   | 0.6027  | -1.0086 | 2.2719  |
| C   | 0.1600  | 3.2286  | -4.6581 | H   | -0.2538 | 0.2892  | 2.6070  |
| C   | -1.6194 | 3.6831  | 2.4390  | O   | -1.3522 | -0.9871 | 0.2609  |
| C   | 5.5706  | 1.8563  | -0.8044 | H   | -0.9759 | -1.7065 | 0.7984  |
| N   | -3.8038 | 0.8732  | -4.9229 | C   | 0.1916  | 3.2476  | -4.6608 |
| Cps | 1.3586  | 4.2003  | -4.5616 | C   | -1.6530 | 3.6007  | 2.3995  |
| Cps | -1.9306 | 4.8107  | 1.4757  | C   | 5.6621  | 1.8609  | -0.8520 |
| Cps | 5.7018  | 2.2085  | -2.2967 | N   | -3.8389 | 0.8683  | -4.8945 |
| Cps | -3.3564 | 0.2685  | -6.1387 | Cps | 1.3842  | 4.2213  | -4.5506 |

15<sup>OH</sup>

|    |         |         |         |
|----|---------|---------|---------|
| H  | -0.7533 | 3.7682  | -4.4713 |
| H  | 0.1080  | 2.8560  | -5.6789 |
| C  | 0.1945  | 2.0828  | -3.7404 |
| N  | 0.8362  | 0.8916  | -4.0207 |
| H  | 1.3218  | 0.6760  | -4.8897 |
| C  | 0.7561  | 0.1115  | -2.9196 |
| H  | 1.1998  | -0.8686 | -2.8217 |
| N  | 0.0943  | 0.7240  | -1.9581 |
| C  | -0.2647 | 1.9470  | -2.4605 |
| H  | -0.7988 | 2.6562  | -1.8451 |
| H  | -0.7610 | 3.7752  | 3.0239  |
| H  | -2.4511 | 3.4252  | 3.1271  |
| C  | -1.3610 | 2.2228  | 1.8247  |
| O  | -0.8048 | 2.1181  | 0.6925  |
| O  | -1.6224 | 1.2848  | 2.6133  |
| H  | 6.0834  | 0.8677  | -0.6960 |
| H  | 6.2648  | 2.5346  | -0.2303 |
| C  | 4.2856  | 1.8432  | -0.2867 |
| N  | 3.6888  | 2.9290  | 0.3212  |
| H  | 4.1528  | 3.8031  | 0.5712  |
| C  | 2.4021  | 2.6165  | 0.5710  |
| H  | 1.7037  | 3.2767  | 1.0612  |
| N  | 2.1328  | 1.3965  | 0.1467  |
| C  | 3.2989  | 0.9032  | -0.3778 |
| H  | 3.3416  | -0.0941 | -0.7899 |
| C  | -4.3080 | 2.1342  | -4.7065 |
| H  | -4.4276 | 2.8247  | -5.5293 |
| N  | -4.5786 | 2.3880  | -3.4481 |
| C  | -4.2775 | 1.2201  | -2.7893 |
| C  | -4.3268 | 0.8598  | -1.4154 |
| N  | -4.5893 | 1.6144  | -0.3772 |
| H  | -4.9124 | 2.5793  | -0.4414 |
| H  | -4.3342 | 1.1840  | 0.5355  |
| N  | -4.0502 | -0.4687 | -1.1960 |
| C  | -4.2893 | -1.0068 | 0.2390  |
| H  | -3.9960 | -2.0679 | 0.1531  |
| H  | -5.3876 | -0.9527 | 0.3330  |
| H  | -2.1856 | -0.6195 | 0.7170  |
| C  | -3.5733 | -1.2905 | -2.1615 |
| H  | -3.3030 | -2.2815 | -1.8154 |
| N  | -3.4245 | -0.9931 | -3.4225 |
| C  | -3.8220 | 0.2655  | -3.6815 |
| Fe | 0.2892  | 0.3154  | 0.1762  |
| O  | 1.0545  | -7.4378 | -0.0504 |
| C  | 1.7526  | -6.4511 | 0.3234  |
| O  | 2.9198  | -6.5500 | 0.7735  |
| C  | 1.0775  | -5.0826 | 0.2569  |
| H  | 0.3085  | -5.1210 | -0.5210 |
| H  | 0.5582  | -4.9544 | 1.2139  |
| C  | 1.9828  | -3.8710 | 0.0461  |
| H  | 2.8512  | -3.9749 | 0.7065  |
| H  | 2.3635  | -3.8128 | -0.9771 |
| C  | 1.2666  | -2.5677 | 0.4012  |

TS<sub>15Pun</sub><sup>OH</sup>

|    |         |         |         |
|----|---------|---------|---------|
| H  | -0.7466 | -3.7601 | 4.4628  |
| H  | 0.1233  | 2.8167  | -5.6390 |
| C  | 0.2056  | 2.0990  | -3.6784 |
| N  | 0.8400  | 0.8987  | -3.9362 |
| H  | 1.3243  | 0.6648  | -4.8005 |
| C  | 0.7303  | 0.1256  | -2.8339 |
| H  | 1.1592  | -0.8598 | -2.7261 |
| N  | 0.0596  | 0.7497  | -1.8837 |
| C  | -0.2789 | 1.9738  | -2.4045 |
| H  | -0.8269 | 2.6882  | -1.8080 |
| H  | -0.8239 | 3.8466  | 3.0959  |
| H  | -2.5155 | 3.4865  | 3.1311  |
| C  | -1.3522 | 2.2668  | 1.9142  |
| O  | -0.8119 | 2.1225  | 0.7822  |
| O  | -1.5770 | 1.3575  | 2.7511  |
| H  | 6.0521  | 0.8606  | -0.7118 |
| H  | 6.2376  | 2.5263  | -0.2433 |
| C  | 4.2576  | 1.8432  | -0.3121 |
| N  | 3.6681  | 2.9265  | 0.3089  |
| H  | 4.1343  | 3.8006  | 0.5558  |
| C  | 2.3900  | 2.6060  | 0.5921  |
| H  | 1.7001  | 3.2632  | 1.0985  |
| N  | 2.1167  | 1.3829  | 0.1784  |
| C  | 3.2730  | 0.8968  | -0.3758 |
| H  | 3.3118  | -0.0999 | -0.7898 |
| C  | -4.5678 | 1.9978  | -4.6951 |
| H  | -4.9428 | 2.5863  | -5.5201 |
| N  | -4.7254 | 2.2825  | -3.4235 |
| C  | -4.0751 | 1.2636  | -2.7563 |
| C  | -3.8396 | 0.9761  | -1.3892 |
| N  | -4.2551 | 1.7130  | -0.3578 |
| H  | -4.8088 | 2.5613  | -0.4363 |
| H  | -4.0168 | 1.3871  | 0.5679  |
| N  | -3.1323 | -0.1425 | -1.1303 |
| C  | -5.4404 | -0.8752 | 0.7316  |
| H  | -5.5684 | -1.6860 | -0.0098 |
| H  | -6.2190 | -0.0993 | 0.7402  |
| H  | -2.2719 | -0.7517 | 0.3283  |
| C  | -2.6544 | -0.8976 | -2.1249 |
| H  | -2.0635 | -1.7546 | -1.8085 |
| N  | -2.7983 | -0.7231 | -3.4263 |
| C  | -3.5204 | 0.3757  | -3.6643 |
| Fe | 0.2525  | 0.3236  | 0.2780  |
| O  | 1.0506  | -7.4386 | -0.0534 |
| C  | 1.7343  | -6.4448 | 0.3271  |
| O  | 2.9085  | -6.5248 | 0.7613  |
| C  | 1.0261  | -5.0915 | 0.2894  |
| H  | 0.2554  | -5.1385 | -0.4860 |
| H  | 0.5084  | -4.9946 | 1.2511  |
| C  | 1.8959  | -3.8520 | 0.0914  |



|               |         |         |         |                 |         |         |         |
|---------------|---------|---------|---------|-----------------|---------|---------|---------|
| H             | 2.7583  | -3.9294 | 0.7633  | H               | 0.2209  | -5.0846 | -0.4804 |
| H             | 2.2883  | -3.7813 | -0.9262 | H               | 0.4951  | -4.9415 | 1.2544  |
| C             | 1.1328  | -2.5753 | 0.4439  | C               | 1.9004  | -3.8394 | 0.0740  |
| O             | 1.2178  | -1.5723 | -0.3205 | H               | 2.7751  | -3.9468 | 0.7249  |
| O             | 0.4415  | -2.6115 | 1.5052  | H               | 2.2738  | -3.7811 | -0.9517 |
| O             | -4.4981 | -0.8358 | 1.4868  | C               | 1.2043  | -2.5297 | 0.4309  |
| O             | 0.7025  | -0.0175 | 2.3860  | O               | 1.3773  | -1.5299 | -0.3171 |
| H             | 0.6165  | -0.9880 | 2.3791  | O               | 0.4900  | -2.5317 | 1.4838  |
| H             | -0.1423 | 0.3432  | 2.7277  | O               | -5.3883 | 1.1692  | 2.0128  |
| O             | -1.4318 | -0.8404 | 0.8253  | O               | 0.5726  | 0.0273  | 2.2649  |
| H             | -1.1506 | -1.7540 | 0.9928  | H               | 0.5781  | -0.9524 | 2.2509  |
| C             | 0.2025  | 3.2423  | -4.6342 | H               | -0.3123 | 0.3126  | 2.5581  |
| C             | -1.6867 | 3.6514  | 2.4365  | O               | -1.3417 | -0.9804 | 0.2311  |
| C             | 5.6393  | 1.8566  | -0.8734 | H               | -1.1275 | -1.6797 | 0.8683  |
| N             | -3.8440 | 0.8599  | -4.8874 | C               | 0.1998  | 3.2588  | -4.6786 |
| Cps           | 1.3876  | 4.2358  | -4.5579 | C               | -1.7517 | 3.5009  | 2.3291  |
| Cps           | -1.9475 | 4.7983  | 1.4775  | C               | 5.6889  | 1.8540  | -0.8435 |
| Cps           | 5.7589  | 2.2341  | -2.3636 | N               | -3.8162 | 0.9427  | -4.9094 |
| Cps           | -3.3700 | 0.2667  | -6.0976 | Cps             | 1.3972  | 4.2281  | -4.5572 |
|               |         |         |         | Cps             | -1.9524 | 4.7301  | 1.4645  |
|               |         |         |         | Cps             | 5.7608  | 2.2350  | -2.3334 |
|               |         |         |         | Cps             | -3.3686 | 0.2706  | -6.0922 |
| $P_{un}^{OH}$ |         |         |         |                 |         |         |         |
| H             | -0.7435 | 3.7800  | -4.4867 |                 |         |         |         |
| H             | 0.1179  | 2.8757  | -5.6994 | $TS_{12P}^{OH}$ |         |         |         |
| C             | 0.1980  | 2.0865  | -3.7665 | H               | -0.8240 | -3.7761 | 4.5894  |
| N             | 0.8363  | 0.8954  | -4.0547 | H               | 0.0912  | 2.8610  | -5.7526 |
| H             | 1.3112  | 0.6791  | -4.9298 | C               | 0.0713  | 2.0832  | -3.8167 |
| C             | 0.7575  | 0.1089  | -2.9602 | N               | 0.7875  | 0.9199  | -4.0196 |
| H             | 1.1946  | -0.8748 | -2.8749 | H               | 1.3340  | 0.7010  | -4.8512 |
| N             | 0.1028  | 0.7188  | -1.9911 | C               | 0.6277  | 0.1436  | -2.9262 |
| C             | -0.2587 | 1.9451  | -2.4868 | H               | 1.1056  | -0.8125 | -2.7732 |
| H             | -0.7984 | 2.6485  | -1.8701 | N               | -0.1513 | 0.7328  | -2.0386 |
| H             | -0.8806 | 3.5983  | 3.0003  | C               | -0.5097 | 1.9359  | -2.5903 |
| H             | -2.5948 | 3.3232  | 3.0022  | H               | -1.1361 | 2.6336  | -2.0543 |
| C             | -1.4815 | 2.1622  | 1.6695  | H               | -0.7845 | 3.7291  | 2.9960  |
| O             | -0.8159 | 2.1057  | 0.6026  | H               | -2.5041 | 3.5347  | 3.1544  |
| O             | -1.8756 | 1.1680  | 2.3379  | C               | -1.5690 | 2.2624  | 1.8034  |
| H             | 6.1137  | 0.8613  | -0.6953 | O               | -1.1257 | 2.1288  | 0.6367  |
| H             | 6.2971  | 2.5268  | -0.2261 | O               | -1.8519 | 1.3238  | 2.6035  |
| C             | 4.3166  | 1.8358  | -0.2660 | H               | 5.7890  | 0.9039  | -0.5715 |
| N             | 3.7261  | 2.9212  | 0.3487  | H               | 6.0414  | 2.5770  | -0.1605 |
| H             | 4.1941  | 3.7919  | 0.6046  | C               | 4.0329  | 1.9981  | -0.3556 |
| C             | 2.4364  | 2.6183  | 0.5912  | N               | 3.4559  | 3.1090  | 0.2256  |
| H             | 1.7439  | 3.2813  | 1.0857  | H               | 3.9430  | 3.9661  | 0.4913  |
| N             | 2.1584  | 1.4035  | 0.1559  | C               | 2.1437  | 2.8560  | 0.4047  |
| C             | 3.3227  | 0.9048  | -0.3688 | H               | 1.4633  | 3.5469  | 0.8762  |
| H             | 3.3592  | -0.0876 | -0.7926 | N               | 1.8371  | 1.6531  | -0.0420 |
| C             | -4.3439 | 2.1942  | -4.7900 | C               | 3.0074  | 1.1098  | -0.5045 |
| H             | -4.5642 | 2.8080  | -5.6519 | H               | 3.0284  | 0.1087  | -0.9076 |
| N             | -4.5370 | 2.5384  | -3.5396 | C               | -4.2319 | 2.3224  | -4.9558 |
| C             | -4.1100 | 1.4506  | -2.8085 | H               | -4.3759 | 2.9290  | -5.8392 |
| C             | -4.0116 | 1.1994  | -1.4168 | N               | -4.4543 | 2.7014  | -3.7184 |
| N             | -4.2933 | 2.0943  | -0.4726 | C               | -4.1446 | 1.5980  | -2.9539 |
| H             | -4.7321 | 2.9878  | -0.6668 | C               | -4.1295 | 1.3426  | -1.5634 |
| H             | -4.3470 | 1.7774  | 0.4904  | N               | -4.3899 | 2.2587  | -0.6295 |
| N             | -3.5738 | -0.0251 | -1.0522 | H               | -4.7342 | 3.1885  | -0.8333 |
| C             | -5.8636 | 0.0901  | 1.7382  | H               | -4.4740 | 1.9600  | 0.3268  |
| H             | -5.5884 | -0.4377 | 0.8091  | N               | -3.8006 | 0.0911  | -1.1989 |
| H             | -6.5901 | -0.3978 | 2.4087  | C               | -2.7610 | -0.6960 | 0.5839  |
| H             | -2.2465 | -0.6286 | 0.2946  | H               | -3.4659 | -1.5349 | 0.5757  |
| C             | -3.2081 | -0.9054 | -2.0000 | H               | -3.0371 | 0.2072  | 1.1325  |
| H             | -2.8441 | -1.8557 | -1.6218 | H               | -1.3407 | -3.1783 | 0.8027  |
| N             | -3.2029 | -0.7589 | -3.3154 | C               | -3.4599 | -0.8313 | -2.1127 |
| C             | -3.6714 | 0.4463  | -3.6527 | H               | -3.1925 | -1.8044 | -1.7109 |
| Fe            | 0.3191  | 0.3355  | 0.1272  | N               | -3.3902 | -0.6864 | -3.4187 |
| O             | 1.0098  | -7.4033 | -0.0648 | C               | -3.7487 | 0.5517  | -3.7630 |
| C             | 1.6951  | -6.4126 | 0.3192  | Fe              | 0.0874  | 0.4091  | 0.1224  |
| O             | 2.8704  | -6.4972 | 0.7505  | O               | 1.0915  | -7.1968 | -0.1087 |
| C             | 0.9999  | -5.0520 | 0.2875  |                 |         |         |         |

|                 |         |         |         |     |         |         |         |
|-----------------|---------|---------|---------|-----|---------|---------|---------|
| C               | 1.7830  | -6.2032 | 0.2582  | H   | 1.6175  | 3.3843  | 1.0588  |
| O               | 2.9682  | -6.2893 | 0.6666  | N   | 2.0175  | 1.4846  | 0.1674  |
| C               | 1.0808  | -4.8440 | 0.2498  | C   | 3.1798  | 0.9682  | -0.3446 |
| H               | 0.2548  | -4.8748 | -0.4649 | H   | 3.2093  | -0.0360 | -0.7408 |
| H               | 0.6250  | -4.7326 | 1.2402  | C   | -4.3529 | 2.2094  | -4.8765 |
| C               | 1.9526  | -3.6154 | -0.0099 | H   | -4.5929 | 2.8133  | -5.7401 |
| H               | 2.8754  | -3.7224 | 0.5709  | N   | -4.5531 | 2.5564  | -3.6267 |
| H               | 2.2336  | -3.5237 | -1.0625 | C   | -4.1009 | 1.4823  | -2.8902 |
| C               | 1.2602  | -2.3329 | 0.4412  | C   | -4.0249 | 1.2164  | -1.5016 |
| O               | 1.2287  | -1.3500 | -0.3562 | N   | -4.3731 | 2.0756  | -0.5410 |
| O               | 0.7635  | -2.3382 | 1.6037  | H   | -4.8018 | 2.9775  | -0.7076 |
| O               | -1.6006 | -0.8819 | 0.2122  | H   | -4.3611 | 1.7559  | 0.4126  |
| O               | 0.5145  | 0.1769  | 2.1855  | N   | -3.5404 | 0.0100  | -1.1592 |
| H               | 0.5640  | -0.8132 | 2.1647  | C   | -2.6467 | -0.7792 | 0.7285  |
| H               | -0.3256 | 0.4515  | 2.5953  | H   | -3.3436 | -1.6236 | 0.6850  |
| O               | -2.0963 | -3.7590 | 0.6480  | H   | -2.9599 | 0.1255  | 1.2606  |
| H               | -2.2418 | -4.2118 | 1.4955  | H   | -1.2563 | -3.3203 | 1.0510  |
| C               | 0.1240  | 3.2478  | -4.7297 | C   | -3.1050 | -0.8511 | -2.0908 |
| C               | -1.7120 | 3.6377  | 2.4060  | H   | -2.6881 | -1.7767 | -1.7012 |
| C               | 5.4523  | 1.9130  | -0.8056 | N   | -3.1053 | -0.6950 | -3.4017 |
| N               | -3.7962 | 1.0334  | -5.0222 | C   | -3.6266 | 0.4899  | -3.7310 |
| Cps             | 1.3255  | 4.2008  | -4.5610 | Fe  | 0.2052  | 0.3432  | 0.2408  |
| Cps             | -1.9307 | 4.8106  | 1.4763  | O   | 1.0288  | -7.2993 | -0.1087 |
| Cps             | 5.7018  | 2.2089  | -2.2961 | C   | 1.7230  | -6.3308 | 0.3105  |
| Cps             | -3.3562 | 0.2690  | -6.1386 | O   | 2.9136  | -6.4360 | 0.7023  |
|                 |         |         |         | C   | 1.0390  | -4.9731 | 0.3994  |
|                 |         |         |         | H   | 0.1347  | -4.9800 | -0.2103 |
| p <sup>OH</sup> |         |         |         | H   | 0.7078  | -4.8654 | 1.4378  |
|                 |         |         |         | C   | 1.8926  | -3.7607 | 0.0377  |
| H               | -0.8280 | 3.7530  | -4.4521 | H   | 2.8564  | -3.8417 | 0.5546  |
| H               | 0.0151  | 2.8097  | -5.6474 | H   | 2.1048  | -3.7147 | -1.0339 |
| C               | 0.1043  | 2.0724  | -3.6943 | C   | 1.2271  | -2.4599 | 0.4769  |
| N               | 0.7542  | 0.8786  | -3.9439 | O   | 1.2890  | -1.4561 | -0.2896 |
| H               | 1.2460  | 0.6459  | -4.8040 | O   | 0.6572  | -2.4710 | 1.6066  |
| C               | 0.6438  | 0.1082  | -2.8397 | O   | -1.4682 | -0.9553 | 0.4242  |
| H               | 1.0844  | -0.8706 | -2.7210 | O   | 0.5976  | 0.0313  | 2.3181  |
| N               | -0.0416 | 0.7301  | -1.8986 | H   | 0.5586  | -0.9555 | 2.2579  |
| C               | -0.3887 | 1.9486  | -2.4253 | H   | -0.2266 | 0.3654  | 2.7148  |
| H               | -0.9486 | 2.6624  | -1.8390 | O   | -2.0587 | -3.8199 | 0.8429  |
| H               | -0.7704 | 3.8324  | 3.0649  | H   | -2.2405 | -4.3478 | 1.6419  |
| H               | -2.4798 | 3.5542  | 3.1909  | C   | 0.1105  | 3.2208  | -4.6383 |
| C               | -1.4398 | 2.2720  | 1.9204  | C   | -1.6764 | 3.6689  | 2.4563  |
| O               | -0.9491 | 2.1082  | 0.7754  | C   | 5.5673  | 1.8720  | -0.8000 |
| O               | -1.6999 | 1.3572  | 2.7533  | N   | -3.7920 | 0.9720  | -4.9881 |
| H               | 5.9603  | 0.8722  | -0.6169 | Cps | 1.3152  | 4.1860  | -4.5581 |
| H               | 6.1735  | 2.5413  | -0.1764 | Cps | -1.9309 | 4.8054  | 1.4842  |
| C               | 4.1798  | 1.8943  | -0.2615 | Cps | 5.7070  | 2.2163  | -2.2932 |
| N               | 3.5962  | 2.9970  | 0.3284  | Cps | -3.3506 | 0.2734  | -6.1559 |
| H               | 4.0687  | 3.8710  | 0.5633  |     |         |         |         |
| C               | 2.3033  | 2.7062  | 0.5755  |     |         |         |         |
